# Supplementary material for: Gut Mycobiota Dysbiosis in Pulmonary Tuberculosis Patients Undergoing Anti-Tuberculosis Treatment
Source: PubMed Central journal article supplement (PMC8672887; doi:10.1128/spectrum.00615-21), 2021-12-15
Supplement: spectrum00615-21_supp_1_seq2.pdf [file spectrum00615-21_supp_1_seq2.pdf]

1 **Supplementary figures**

2

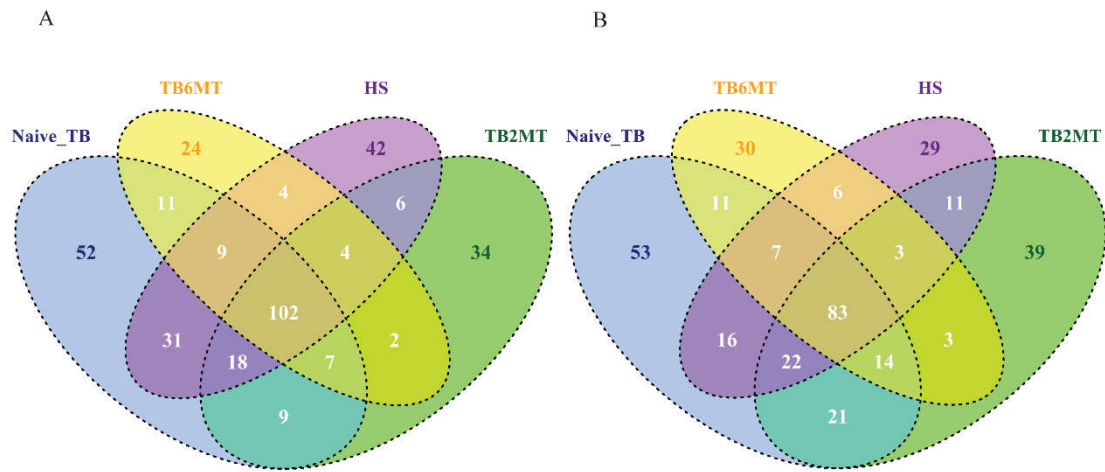

3

4 **Figure S1 Genus composition analyses of the bacterial and fungal microbiota**

5 **among the four groups.** (A) Composition analysis of the bacterial genera within the

6 gut bacterial microbiota. (B) Composition analysis of the fungal genera within the gut

7 mycobiota. HS: healthy subjects; Naive TB: naive TB patients; TB2MT: TB patients

8 after 2 months of treatment; TB6MT: TB patients after 6 months of treatment.

9

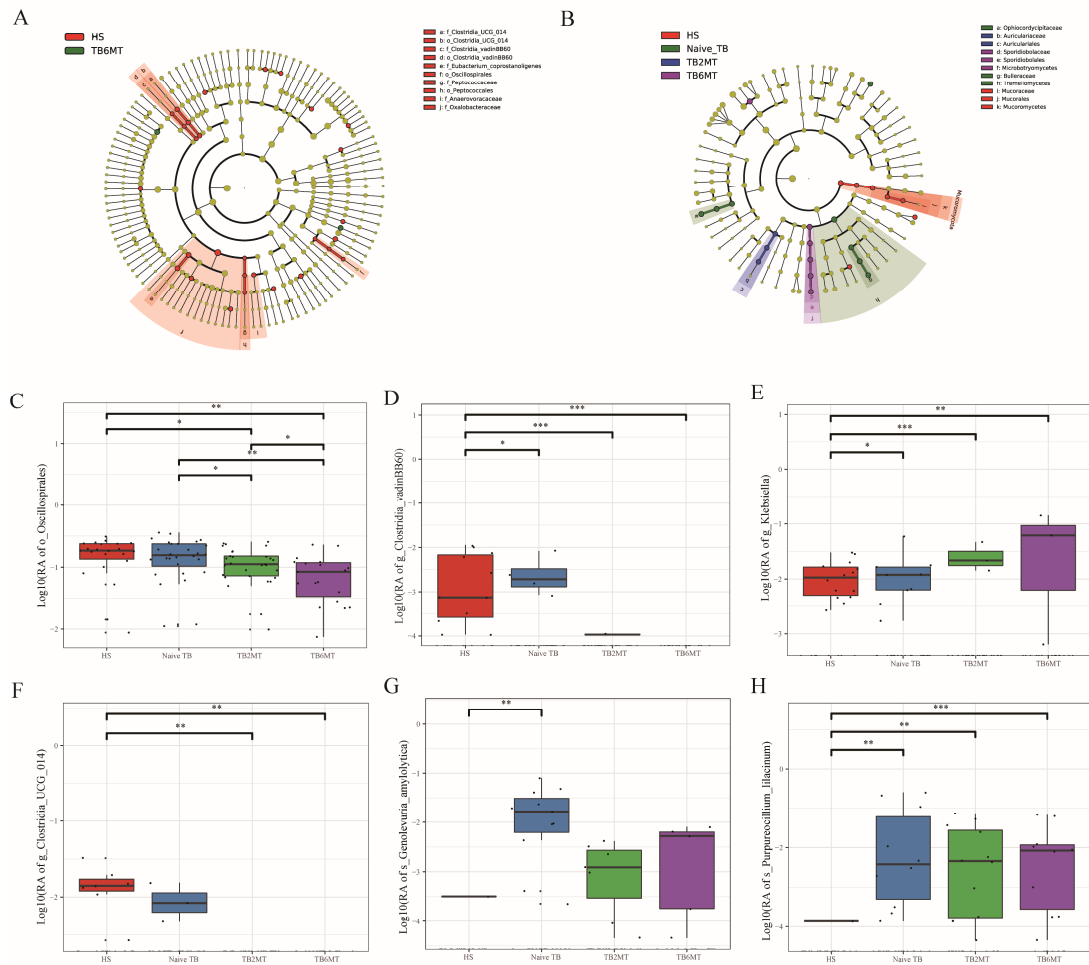

10

11 **Figure S2 Analysis of differential taxa abundances among the four groups.**

12 Significantly different taxa of bacteria (A) and fungi (B) shown in the cladogram

13 identified by LEfSe. The relative abundances (RAs) of *Eubacterium coprostanoligenes*

14 (C), *Clostridia vadinBB60* (D), *Klebsiella* (E), *Clostridia UCG\_014* (F), *Genolevuria*

15 *amylytica* (G) and *Purpureocillium lilacinum* (H) were compared among the four  
16 groups. HS: healthy subjects; Naive TB: naive TB patients; TB2MT: TB patients after  
17 2 months of treatment; TB6MT: TB patients after 6 months of treatment (Wilcoxon  
18 Rank Sum test, \* $p < 0.05$ ; \*\* $p < 0.01$ ; \*\*\* $p < 0.001$ )
