# Supplementary material for: Gut Mycobiota Dysbiosis in Pulmonary Tuberculosis Patients Undergoing Anti-Tuberculosis Treatment
Source: PubMed Central journal article supplement (PMC8672887; doi:10.1128/spectrum.00615-21), 2021-12-15
Supplement: spectrum00615-21_supp_2_seq3.pdf [file spectrum00615-21_supp_2_seq3.pdf]

- 1 **Table S1** The results of Spearman abundance correlation analysis of naive TB group at the genus level. Only significant correlations with  $p \leq$   
2 0.10 after false discovery rate correction and  $|r| \geq 0.6$  are displayed.

| genus_a                                                                                              | genus_b                                                                                            | r               | p value      | p(FDR)          |
|------------------------------------------------------------------------------------------------------|----------------------------------------------------------------------------------------------------|-----------------|--------------|-----------------|
| k_Fungi;p_Ascomycota;c_Sordariomycetes;o_Sordariales;f_Chaetomiaceae;g_Chaetomium                    | k_Fungi;p_Ascomycota;c_Dothideomycetes;o_Pleosporales;f_Sporormiaceae;g_Preussia                   | 0.84171<br>4438 | 1.99<br>E-08 | 6.63E-<br>05    |
| k_Bacteria;p_Firmicutes;c_Bacilli;o_Erysipelotrichales;f_Erysipelotrichaceae;g_Clostridium_innocuum  | k_Fungi;p_Ascomycota;c_Dothideomycetes;o_Pleosporales;f_Sporormiaceae;g_Preussia                   | 0.69113<br>5301 | 4.66<br>E-05 | 0.01384<br>1455 |
| k_Bacteria;p_Bacteroidota;c_Bacteroidia;o_Bacteroidales;f_Tannerellaceae;g_Parabacteroides           | k_Fungi;p_Ascomycota;c_Sordariomycetes;o_Hypocreales;f_Hypocreales_fam_Incertae_sedis;g_Acremonium | 0.62104<br>4363 | 4.21<br>E-04 | 0.05311<br>5464 |
| k_Bacteria;p_Proteobacteria;c_Gammaproteobacteria;o_Pseudomonadales;f_Moraxellaceae;g_Acinetobacter  | k_Fungi;p_Ascomycota;c_Sordariomycetes;o_Hypocreales;f_Ophiocordycipitaceae;g_Purpureocillium      | 0.61229<br>0503 | 5.34<br>E-04 | 0.05991<br>1637 |
| k_Bacteria;p_Firmicutes;c_Bacilli;o_Erysipelotrichales;f_Erysipelotrichaceae;g_Clostridium_innocuum  | k_Fungi;p_Ascomycota;c_Sordariomycetes;o_Sordariales;f_Chaetomiaceae;g_Chaetomium                  | 0.67091<br>7616 | 9.33<br>E-05 | 0.01965<br>6126 |
| k_Bacteria;p_Firmicutes;c_Clostridia;o_Oscillospirales;f_Ruminococcaceae;g_Candidatus_Soleaferrea    | k_Fungi;p_Ascomycota;c_Sordariomycetes;o_Sordariales;f_Chaetomiaceae;g_Chaetomium                  | 0.61664<br>6135 | 4.75<br>E-04 | 0.05761<br>2038 |
| k_Bacteria;p_Bacteroidota;c_Bacteroidia;o_Bacteroidales;f_Marinifilaceae;g_Butyricimonas             | k_Fungi;p_Basidiomycota;c_Tremellomycetes;o_Filobasidiales;f_Filobasidiaceae;g_Naganishia          | 0.63715<br>7663 | 2.66<br>E-04 | 0.03952<br>5623 |
| k_Bacteria;p_Firmicutes;c_Clostridia;o_Oscillospirales;f_Ruminococcaceae;g_Eubacterium_siraeum       | k_Fungi;p_Basidiomycota;c_Tremellomycetes;o_Filobasidiales;f_Filobasidiaceae;g_Naganishia          | 0.66654<br>3575 | 1.08<br>E-04 | 0.02053<br>1352 |
| k_Bacteria;p_Firmicutes;c_Clostridia;o_Peptococcales;f_Peptococcaceae;g_Peptococcus                  | k_Fungi;p_Basidiomycota;c_Tremellomycetes;o_Filobasidiales;f_Filobasidiaceae;g_Naganishia          | 0.67940<br>8031 | 7.01<br>E-05 | 0.01785<br>7232 |
| k_Bacteria;p_Proteobacteria;c_Gammaproteobacteria;o_Burkholderiales;f_Oxalobacteraceae;g_Oxalobacter | k_Fungi;p_Basidiomycota;c_Tremellomycetes;o_Filobasidiales;f_Filobasidiaceae;g_Naganishia          | 0.82871<br>5682 | 5.14<br>E-08 | 9.17E-<br>05    |
| k_Bacteria;p_Firmicutes;c_Bacilli;o_Lactobacillales;f_Streptococcaceae;g_Streptococcus               | k_Bacteria;p_Actinobacteriota;c_Actinobacteria;o_Actinomycetales;f_Actinomycetaceae;g_Actinomyces  | 0.67805<br>3565 | 7.34<br>E-05 | 0.01808<br>7092 |

|                                                                                                                    |                                                                                                       |                      |              |                 |
|--------------------------------------------------------------------------------------------------------------------|-------------------------------------------------------------------------------------------------------|----------------------|--------------|-----------------|
| k_Bacteria;p_Firmicutes;c_Bacilli;o_Erysipelotrichales;f_Erysipelatoclostridiaceae;g_Erysipelatoclostridium        | k_Bacteria;p_Actinobacteriota;c_Coriobacteriia;o_Coriobacteriales;f_Coriobacteriaceae;g_Collinsella   | -<br>0.67288<br>5288 | 8.74<br>E-05 | 0.01946<br>2767 |
| k_Bacteria;p_Firmicutes;c_Clostridia;o_Lachnospirales;f_Lachnospiraceae;g_Dorea                                    | k_Bacteria;p_Actinobacteriota;c_Coriobacteriia;o_Coriobacteriales;f_Coriobacteriaceae;g_Collinsella   | 0.61176<br>5529      | 5.42<br>E-04 | 0.05991<br>1637 |
| k_Bacteria;p_Firmicutes;c_Bacilli;o_Erysipelotrichales;f_Erysipelotrichaceae;g_Holdemanella                        | k_Bacteria;p_Actinobacteriota;c_Coriobacteriia;o_Coriobacteriales;f_Eggertellaceae;g_Senegalimassilia | 0.88187<br>0578      | 5.63<br>E-10 | 5.02E-<br>06    |
| k_Bacteria;p_Firmicutes;c_Bacilli;o_Lactobacillales;f_Lactobacillaceae;g_Lactobacillus                             | k_Bacteria;p_Bacteroidota;c_Bacteroidia;o_Bacteroidales;f_Bacteroidaceae;g_Bacteroides                | -<br>0.62083<br>7673 | 4.23<br>E-04 | 0.05311<br>5464 |
| k_Bacteria;p_Firmicutes;c_Clostridia;o_Christensenellales;f_Christensenellaceae;g_Christensenellaceae_R_7          | k_Bacteria;p_Bacteroidota;c_Bacteroidia;o_Bacteroidales;f_Marinifilaceae;g_Butyricimonas              | 0.74857<br>0772      | 4.62<br>E-06 | 0.00257<br>4383 |
| k_Bacteria;p_Firmicutes;c_Clostridia;o_Clostridia_vadinBB60;f_Clostridia_vadinBB60;g_Clostridia_vadinBB60          | k_Bacteria;p_Bacteroidota;c_Bacteroidia;o_Bacteroidales;f_Marinifilaceae;g_Butyricimonas              | 0.64327<br>9274      | 2.22<br>E-04 | 0.03412<br>3129 |
| k_Bacteria;p_Firmicutes;c_Clostridia;o_Lachnospirales;f_Lachnospiraceae;g_Eubacterium_oxidoreducens                | k_Bacteria;p_Bacteroidota;c_Bacteroidia;o_Bacteroidales;f_Marinifilaceae;g_Butyricimonas              | 0.69315<br>2306      | 4.34<br>E-05 | 0.01357<br>0443 |
| k_Bacteria;p_Firmicutes;c_Clostridia;o_Lachnospirales;f_Lachnospiraceae;g_Lachnospiraceae_NC2004                   | k_Bacteria;p_Bacteroidota;c_Bacteroidia;o_Bacteroidales;f_Marinifilaceae;g_Butyricimonas              | 0.83004<br>9647      | 4.68<br>E-08 | 9.17E-<br>05    |
| k_Bacteria;p_Firmicutes;c_Clostridia;o_Lachnospirales;f_Lachnospiraceae;g_Lachnospiraceae_UCG_001                  | k_Bacteria;p_Bacteroidota;c_Bacteroidia;o_Bacteroidales;f_Marinifilaceae;g_Butyricimonas              | 0.74923<br>2369      | 4.49<br>E-06 | 0.00257<br>4383 |
| k_Bacteria;p_Firmicutes;c_Clostridia;o_Oscillospirales;f_Ruminococcaceae;g_Eubacterium_siraeum                     | k_Bacteria;p_Bacteroidota;c_Bacteroidia;o_Bacteroidales;f_Marinifilaceae;g_Butyricimonas              | 0.66470<br>4912      | 1.14<br>E-04 | 0.02077<br>0399 |
| k_Bacteria;p_Firmicutes;c_Clostridia;o_Peptostreptococcales_Tissierellales;f_Anaerovoracaceae;g_Family_XIII_AD3011 | k_Bacteria;p_Bacteroidota;c_Bacteroidia;o_Bacteroidales;f_Marinifilaceae;g_Butyricimonas              | 0.65221<br>4656      | 1.69<br>E-04 | 0.02841<br>5762 |
| k_Bacteria;p_Proteobacteria;c_Gammaproteobacteria;o_Burkholderiales;f_Oxalobacteraceae;g_Oxalobacter               | k_Bacteria;p_Bacteroidota;c_Bacteroidia;o_Bacteroidales;f_Marinifilaceae;g_Butyricimonas              | 0.60825<br>9974      | 5.95<br>E-04 | 0.06167<br>4054 |

|                                                                                                                        |                                                                                           |                      |              |                 |
|------------------------------------------------------------------------------------------------------------------------|-------------------------------------------------------------------------------------------|----------------------|--------------|-----------------|
| k_Bacteria;p_Bacteroidota;c_Bacteroidia;o_Bacteroidales;f_Rikenellaceae;g_Alistipes                                    | k_Bacteria;p_Bacteroidota;c_Bacteroidia;o_Bacteroidales;f_Marinifilaceae;g_Odoribacter    | 0.84021<br>4102      | 2.23<br>E-08 | 6.63E-<br>05    |
| k_Bacteria;p_Firmicutes;c_Clostridia;o_Christensenellales;f_Christensenellaceae;g_Christensenellaceae_R_7              | k_Bacteria;p_Bacteroidota;c_Bacteroidia;o_Bacteroidales;f_Marinifilaceae;g_Odoribacter    | 0.60173<br>5329      | 7.06<br>E-04 | 0.06835<br>4388 |
| k_Bacteria;p_Firmicutes;c_Clostridia;o_Lachnospirales;f_Lachnospiraceae;g_Eubacterium_ventriosum                       | k_Bacteria;p_Bacteroidota;c_Bacteroidia;o_Bacteroidales;f_Marinifilaceae;g_Odoribacter    | 0.61558<br>6422      | 4.89<br>E-04 | 0.05806<br>15   |
| k_Bacteria;p_Firmicutes;c_Clostridia;o_Oscillospirales;f_Eubacterium_coprostanoligenes;g_Eubacterium_coprostanoligenes | k_Bacteria;p_Bacteroidota;c_Bacteroidia;o_Bacteroidales;f_Marinifilaceae;g_Odoribacter    | 0.67040<br>2081      | 9.49<br>E-05 | 0.01965<br>6126 |
| k_Bacteria;p_Firmicutes;c_Clostridia;o_Oscillospirales;f_Ruminococcaceae;g_Ruminococcus                                | k_Bacteria;p_Bacteroidota;c_Bacteroidia;o_Bacteroidales;f_Marinifilaceae;g_Odoribacter    | 0.63325<br>7896      | 2.98<br>E-04 | 0.04149<br>7623 |
| k_Bacteria;p_Firmicutes;c_Clostridia;o_Peptostreptococcales_Tissierellales;f_Anaerovoracaceae;g_Family_XIII_AD3011     | k_Bacteria;p_Bacteroidota;c_Bacteroidia;o_Bacteroidales;f_Marinifilaceae;g_Odoribacter    | 0.60804<br>3024      | 5.98<br>E-04 | 0.06167<br>4054 |
| k_Bacteria;p_Firmicutes;c_Bacilli;o_Erysipelotrichales;f_Erysipelotrichaceae;g_Holdemanella                            | k_Bacteria;p_Bacteroidota;c_Bacteroidia;o_Bacteroidales;f_Muribaculaceae;g_Muribaculaceae | 0.66354<br>2153      | 1.19<br>E-04 | 0.02113<br>1411 |
| k_Bacteria;p_Firmicutes;c_Bacilli;o_Erysipelotrichales;f_Erysipelatoclostridiaceae;g_Erysipelatoclostridium            | k_Bacteria;p_Bacteroidota;c_Bacteroidia;o_Bacteroidales;f_Prevotellaceae;g_Paraprevotella | -<br>0.61833<br>2908 | 4.53<br>E-04 | 0.05611<br>5434 |
| k_Bacteria;p_Firmicutes;c_Bacilli;o_Erysipelotrichales;f_Erysipelotrichaceae;g_Holdemanella                            | k_Bacteria;p_Bacteroidota;c_Bacteroidia;o_Bacteroidales;f_Prevotellaceae;g_Paraprevotella | 0.61126<br>3074      | 5.49<br>E-04 | 0.05991<br>1637 |
| k_Bacteria;p_Firmicutes;c_Clostridia;o_Lachnospirales;f_Lachnospiraceae;g_Eubacterium_ventriosum                       | k_Bacteria;p_Bacteroidota;c_Bacteroidia;o_Bacteroidales;f_Rikenellaceae;g_Alistipes       | 0.62927<br>8194      | 3.34<br>E-04 | 0.04509<br>8296 |
| k_Bacteria;p_Firmicutes;c_Clostridia;o_Lachnospirales;f_Lachnospiraceae;g_Lachnospiraceae_ND3007                       | k_Bacteria;p_Bacteroidota;c_Bacteroidia;o_Bacteroidales;f_Rikenellaceae;g_Alistipes       | 0.63348<br>9194      | 2.96<br>E-04 | 0.04149<br>7623 |
| k_Bacteria;p_Firmicutes;c_Clostridia;o_Lachnospirales;f_Lachnospiraceae;g_Lachnospiraceae_UCG_010                      | k_Bacteria;p_Bacteroidota;c_Bacteroidia;o_Bacteroidales;f_Rikenellaceae;g_Alistipes       | 0.63108<br>9338      | 3.17<br>E-04 | 0.04348<br>5792 |

|                                                                                                                        |                                                                                                             |                      |              |                 |
|------------------------------------------------------------------------------------------------------------------------|-------------------------------------------------------------------------------------------------------------|----------------------|--------------|-----------------|
| k_Bacteria;p_Firmicutes;c_Clostridia;o_Oscillospirales;f_Eubacterium_coprostanoligenes;g_Eubacterium_coprostanoligenes | k_Bacteria;p_Bacteroidota;c_Bacteroidia;o_Bacteroidales;f_Rikenellaceae;g_Alistipes                         | 0.60752<br>7022      | 6.06<br>E-04 | 0.06167<br>4054 |
| k_Bacteria;p_Firmicutes;c_Clostridia;o_Oscillospirales;f_Oscillospiraceae;g_NK4A214                                    | k_Bacteria;p_Bacteroidota;c_Bacteroidia;o_Bacteroidales;f_Rikenellaceae;g_Alistipes                         | 0.61636<br>6025      | 4.78<br>E-04 | 0.05761<br>2038 |
| k_Bacteria;p_Firmicutes;c_Clostridia;o_Oscillospirales;f_Ruminococcaceae;g_Ruminococcus                                | k_Bacteria;p_Bacteroidota;c_Bacteroidia;o_Bacteroidales;f_Rikenellaceae;g_Alistipes                         | 0.70483<br>7492      | 2.82<br>E-05 | 0.00966<br>5989 |
| k_Bacteria;p_Firmicutes;c_Clostridia;o_Lachnospirales;f_Lachnospiraceae;g_Dorea                                        | k_Bacteria;p_Firmicutes;c_Bacilli;o_Erysipelotrichales;f_Erysipelatoclostridiaceae;g_Erysipelatoclostridium | -<br>0.60288<br>1778 | 6.85<br>E-04 | 0.06736<br>3391 |
| k_Bacteria;p_Firmicutes;c_Clostridia;o_Lachnospirales;f_Lachnospiraceae;g_Fusicatenibacter                             | k_Bacteria;p_Firmicutes;c_Bacilli;o_Erysipelotrichales;f_Erysipelatoclostridiaceae;g_Erysipelatoclostridium | -<br>0.65329<br>9279 | 1.64<br>E-04 | 0.02806<br>5138 |
| k_Bacteria;p_Firmicutes;c_Bacilli;o_Erysipelotrichales;f_Erysipelotrichaceae;g_Faecalitalea                            | k_Bacteria;p_Firmicutes;c_Bacilli;o_Erysipelotrichales;f_Erysipelotrichaceae;g_Clostridium_innocuum         | 0.64245<br>0152      | 2.28<br>E-04 | 0.03438<br>4553 |
| k_Bacteria;p_Firmicutes;c_Clostridia;o_Peptostreptococcales_Tissierellales;f_Anaerovoracaceae;g_Family_XIII_UCG_001    | k_Bacteria;p_Firmicutes;c_Bacilli;o_Erysipelotrichales;f_Erysipelotrichaceae;g_Holdemanella                 | 0.61111<br>1111      | 5.51<br>E-04 | 0.05991<br>1637 |
| k_Bacteria;p_Firmicutes;c_Clostridia;o_Clostridia_vadinBB60;f_Clostridia_vadinBB60;g_Clostridia_vadinBB60              | k_Bacteria;p_Firmicutes;c_Clostridia;o_Christensenellales;f_Christensenellaceae;g_Christensenellaceae_R_7   | 0.67459<br>0748      | 8.25<br>E-05 | 0.01905<br>2335 |
| k_Bacteria;p_Firmicutes;c_Clostridia;o_Lachnospirales;f_Lachnospiraceae;g_Lachnospiraceae_NC2004                       | k_Bacteria;p_Firmicutes;c_Clostridia;o_Christensenellales;f_Christensenellaceae;g_Christensenellaceae_R_7   | 0.67161<br>8875      | 9.11<br>E-05 | 0.01965<br>6126 |
| k_Bacteria;p_Firmicutes;c_Clostridia;o_Lachnospirales;f_Lachnospiraceae;g_Lachnospiraceae_NK4A136                      | k_Bacteria;p_Firmicutes;c_Clostridia;o_Christensenellales;f_Christensenellaceae;g_Christensenellaceae_R_7   | 0.75170<br>4569      | 4.00<br>E-06 | 0.00254<br>8907 |
| k_Bacteria;p_Firmicutes;c_Clostridia;o_Lachnospirales;f_Lachnospiraceae;g_Lachnospiraceae_UCG_001                      | k_Bacteria;p_Firmicutes;c_Clostridia;o_Christensenellales;f_Christensenellaceae;g_Christensenellaceae_R_7   | 0.82158<br>1175      | 8.38<br>E-08 | 1.24E-<br>04    |
| k_Bacteria;p_Firmicutes;c_Clostridia;o_Lachnospirales;f_Lachnospiraceae;g_Ruminococcus_gauvreauii                      | k_Bacteria;p_Firmicutes;c_Clostridia;o_Christensenellales;f_Christensenellaceae;g_Christensenellaceae_R_7   | 0.66801<br>813       | 1.03<br>E-04 | 0.02053<br>1352 |

|                                                                                                                        |                                                                                                           |                 |              |                 |
|------------------------------------------------------------------------------------------------------------------------|-----------------------------------------------------------------------------------------------------------|-----------------|--------------|-----------------|
| k_Bacteria;p_Firmicutes;c_Clostridia;o_Monoglobales;f_Monoglobaceae;g_Monoglobus                                       | k_Bacteria;p_Firmicutes;c_Clostridia;o_Christensenellales;f_Christensenellaceae;g_Christensenellaceae_R_7 | 0.60085<br>0164 | 7.22<br>E-04 | 0.06918<br>6955 |
| k_Bacteria;p_Firmicutes;c_Clostridia;o_Oscillospirales;f_Eubacterium_coprostanoligenes;g_Eubacterium_coprostanoligenes | k_Bacteria;p_Firmicutes;c_Clostridia;o_Christensenellales;f_Christensenellaceae;g_Christensenellaceae_R_7 | 0.75219<br>4057 | 3.92<br>E-06 | 0.00254<br>8907 |
| k_Bacteria;p_Firmicutes;c_Clostridia;o_Oscillospirales;f_Ruminococcaceae;g_Eubacterium_siraeum                         | k_Bacteria;p_Firmicutes;c_Clostridia;o_Christensenellales;f_Christensenellaceae;g_Christensenellaceae_R_7 | 0.69609<br>7918 | 3.90<br>E-05 | 0.01286<br>2362 |
| k_Bacteria;p_Firmicutes;c_Clostridia;o_Peptostreptococcales_Tissierellales;f_Anaerovoraceae;g_Family_XIII_AD3011       | k_Bacteria;p_Firmicutes;c_Clostridia;o_Christensenellales;f_Christensenellaceae;g_Christensenellaceae_R_7 | 0.73052<br>4104 | 1.02<br>E-05 | 0.00452<br>8124 |
| k_Bacteria;p_Firmicutes;c_Clostridia;o_Lachnospirales;f_Lachnospiraceae;g_Lachnospiraceae_UCG_001                      | k_Bacteria;p_Firmicutes;c_Clostridia;o_Clostridia_UCG_014;f_Clostridia_UCG_014;g_Clostridia_UCG_014       | 0.71124<br>9962 | 2.21<br>E-05 | 0.00819<br>8748 |
| k_Bacteria;p_Firmicutes;c_Clostridia;o_Lachnospirales;f_Lachnospiraceae;g_Lachnospiraceae_FCS020                       | k_Bacteria;p_Firmicutes;c_Clostridia;o_Clostridia_vadinBB60;f_Clostridia_vadinBB60;g_Clostridia_vadinBB60 | 0.72488<br>9217 | 1.28<br>E-05 | 0.00544<br>653  |
| k_Bacteria;p_Firmicutes;c_Clostridia;o_Lachnospirales;f_Lachnospiraceae;g_Lachnospiraceae_UCG_001                      | k_Bacteria;p_Firmicutes;c_Clostridia;o_Clostridia_vadinBB60;f_Clostridia_vadinBB60;g_Clostridia_vadinBB60 | 0.72334<br>8345 | 1.37<br>E-05 | 0.00553<br>6282 |
| k_Bacteria;p_Firmicutes;c_Clostridia;o_Oscillospirales;f_Ruminococcaceae;g_Eubacterium_siraeum                         | k_Bacteria;p_Firmicutes;c_Clostridia;o_Clostridia_vadinBB60;f_Clostridia_vadinBB60;g_Clostridia_vadinBB60 | 0.68057<br>6071 | 6.74<br>E-05 | 0.01785<br>7232 |
| k_Bacteria;p_Firmicutes;c_Clostridia;o_Peptococcales;f_Peptococcaceae;g_Peptococcus                                    | k_Bacteria;p_Firmicutes;c_Clostridia;o_Clostridia_vadinBB60;f_Clostridia_vadinBB60;g_Clostridia_vadinBB60 | 0.67739<br>4971 | 7.51<br>E-05 | 0.01808<br>7092 |
| k_Bacteria;p_Firmicutes;c_Clostridia;o_Lachnospirales;f_Lachnospiraceae;g_Lachnospiraceae_UCG_001                      | k_Bacteria;p_Firmicutes;c_Clostridia;o_Lachnospirales;f_Lachnospiraceae;g_Eubacterium_eligens             | 0.63656<br>3857 | 2.71<br>E-04 | 0.03955<br>7672 |
| k_Bacteria;p_Firmicutes;c_Clostridia;o_Oscillospirales;f_Ruminococcaceae;g_Ruminococcus                                | k_Bacteria;p_Firmicutes;c_Clostridia;o_Lachnospirales;f_Lachnospiraceae;g_Eubacterium_eligens             | 0.61254<br>3267 | 5.31<br>E-04 | 0.05991<br>1637 |
| k_Bacteria;p_Firmicutes;c_Clostridia;o_Lachnospirales;f_Lachnospiraceae;g_Fusicatenibacter                             | k_Bacteria;p_Firmicutes;c_Clostridia;o_Lachnospirales;f_Lachnospiraceae;g_Eubacterium_hallii              | 0.68621<br>8034 | 5.54<br>E-05 | 0.01593<br>6016 |
| k_Bacteria;p_Firmicutes;c_Clostridia;o_Lachnospirales;f_Lachnospiraceae;g_Lachnospiraceae_UCG_001                      | k_Bacteria;p_Firmicutes;c_Clostridia;o_Lachnospirales;f_Lachnospiraceae;g_Eubacterium_oxidoreducens       | 0.63385<br>1025 | 2.93<br>E-04 | 0.04149<br>7623 |

|                                                                                                                        |                                                                                                     |                 |              |                 |
|------------------------------------------------------------------------------------------------------------------------|-----------------------------------------------------------------------------------------------------|-----------------|--------------|-----------------|
| k_Bacteria;p_Firmicutes;c_Clostridia;o_Peptostreptococcales_Tissierellales;f_Anaerovoraceae;g_Family_XIII_UCG_001      | k_Bacteria;p_Firmicutes;c_Clostridia;o_Lachnospirales;f_Lachnospiraceae;g_Eubacterium_oxidoreducens | 0.64493<br>7142 | 2.11<br>E-04 | 0.03345<br>0035 |
| k_Bacteria;p_Proteobacteria;c_Gammaproteobacteria;o_Burkholderiales;f_Oxalobacteraceae;g_Oxalobacter                   | k_Bacteria;p_Firmicutes;c_Clostridia;o_Lachnospirales;f_Lachnospiraceae;g_Eubacterium_oxidoreducens | 0.61358<br>308  | 5.16<br>E-04 | 0.05991<br>1637 |
| k_Bacteria;p_Proteobacteria;c_Gammaproteobacteria;o_Xanthomonadales;f_Xanthomonadaceae;g_Stenotrophomonas              | k_Bacteria;p_Firmicutes;c_Clostridia;o_Lachnospirales;f_Lachnospiraceae;g_Eubacterium_oxidoreducens | 0.62299<br>5352 | 3.99<br>E-04 | 0.05147<br>9976 |
| k_Bacteria;p_Firmicutes;c_Clostridia;o_Oscillospirales;f_Oscillospiraceae;g_NK4A214                                    | k_Bacteria;p_Firmicutes;c_Clostridia;o_Lachnospirales;f_Lachnospiraceae;g_Eubacterium_ventriosum    | 0.60546<br>5334 | 6.40<br>E-04 | 0.06410<br>6662 |
| k_Bacteria;p_Firmicutes;c_Clostridia;o_Peptostreptococcales_Tissierellales;f_Peptostreptococcaceae;g_Intestinibacter   | k_Bacteria;p_Firmicutes;c_Clostridia;o_Lachnospirales;f_Lachnospiraceae;g_Eubacterium_ventriosum    | 0.60271<br>8495 | 6.88<br>E-04 | 0.06736<br>3391 |
| k_Bacteria;p_Firmicutes;c_Clostridia;o_Peptococcales;f_Peptococcaceae;g_Peptococcus                                    | k_Bacteria;p_Firmicutes;c_Clostridia;o_Lachnospirales;f_Lachnospiraceae;g_Lachnospiraceae_FCS020    | 0.67940<br>8031 | 7.01<br>E-05 | 0.01785<br>7232 |
| k_Bacteria;p_Firmicutes;c_Clostridia;o_Peptostreptococcales_Tissierellales;f_Anaerovoraceae;g_Family_XIII_AD3011       | k_Bacteria;p_Firmicutes;c_Clostridia;o_Lachnospirales;f_Lachnospiraceae;g_Lachnospiraceae_NC2004    | 0.66536<br>5612 | 1.12<br>E-04 | 0.02075<br>5384 |
| k_Bacteria;p_Firmicutes;c_Negativicutes;o_Veillonellales_Selenomonadales;f_Veillonellaceae;g_Megasphaera               | k_Bacteria;p_Firmicutes;c_Clostridia;o_Lachnospirales;f_Lachnospiraceae;g_Lachnospiraceae_NC2004    | 0.68118<br>0431 | 6.60<br>E-05 | 0.01785<br>7232 |
| k_Bacteria;p_Firmicutes;c_Clostridia;o_Lachnospirales;f_Lachnospiraceae;g_Lachnospiraceae_UCG_001                      | k_Bacteria;p_Firmicutes;c_Clostridia;o_Lachnospirales;f_Lachnospiraceae;g_Lachnospiraceae_NK4A136   | 0.67428<br>3683 | 8.34<br>E-05 | 0.01905<br>2335 |
| k_Bacteria;p_Firmicutes;c_Clostridia;o_Monoglobales;f_Monoglobaceae;g_Monoglobus                                       | k_Bacteria;p_Firmicutes;c_Clostridia;o_Lachnospirales;f_Lachnospiraceae;g_Lachnospiraceae_NK4A136   | 0.75773<br>4131 | 3.02<br>E-06 | 0.00224<br>2982 |
| k_Bacteria;p_Firmicutes;c_Clostridia;o_Oscillospirales;f_Eubacterium_coprostanoligenes;g_Eubacterium_coprostanoligenes | k_Bacteria;p_Firmicutes;c_Clostridia;o_Lachnospirales;f_Lachnospiraceae;g_Lachnospiraceae_NK4A136   | 0.72039<br>1329 | 1.54<br>E-05 | 0.00596<br>7725 |
| k_Bacteria;p_Firmicutes;c_Clostridia;o_Peptostreptococcales_Tissierellales;f_Anaerovoraceae;g_Family_XIII_AD3011       | k_Bacteria;p_Firmicutes;c_Clostridia;o_Lachnospirales;f_Lachnospiraceae;g_Lachnospiraceae_NK4A136   | 0.66737<br>8999 | 1.05<br>E-04 | 0.02053<br>1352 |
| k_Bacteria;p_Firmicutes;c_Clostridia;o_Oscillospirales;f_Eubacterium_coprostanoligenes;g_Eubacterium_coprostanoligenes | k_Bacteria;p_Firmicutes;c_Clostridia;o_Lachnospirales;f_Lachnospiraceae;g_Lachnospiraceae_UCG_001   | 0.70727<br>1896 | 2.57<br>E-05 | 0.00916<br>7815 |

|                                                                                                                         |                                                                                                                            |                      |              |                 |
|-------------------------------------------------------------------------------------------------------------------------|----------------------------------------------------------------------------------------------------------------------------|----------------------|--------------|-----------------|
| k_Bacteria;p_Firmicutes;c_Clostridia;o_Oscillospirales;f_Ruminococcaceae;<br>g_Eubacterium_siraeum                      | k_Bacteria;p_Firmicutes;c_Clostridia;o_Lachnospirales;f_Lachnospiraceae;g<br>_Lachnospiraceae_UCG_001                      | 0.73900<br>5235      | 7.07<br>E-06 | 0.00369<br>7584 |
| k_Bacteria;p_Firmicutes;c_Clostridia;o_Peptostreptococcales_Tissierellales;f<br>_Anaerovoracaceae;g_Family_XIII_AD3011  | k_Bacteria;p_Firmicutes;c_Clostridia;o_Lachnospirales;f_Lachnospiraceae;g<br>_Lachnospiraceae_UCG_001                      | 0.65418<br>6503      | 1.59<br>E-04 | 0.02783<br>9096 |
| k_Bacteria;p_Firmicutes;c_Clostridia;o_Peptostreptococcales_Tissierellales;f<br>_Anaerovoracaceae;g_Family_XIII_UCG_001 | k_Bacteria;p_Firmicutes;c_Clostridia;o_Lachnospirales;f_Lachnospiraceae;g<br>_Lachnospiraceae_UCG_001                      | 0.60932<br>352       | 5.78<br>E-04 | 0.06134<br>0644 |
| k_Bacteria;p_Proteobacteria;c_Gammaproteobacteria;o_Burkholderiales;f_O<br>xalobacteraceae;g_Oxalobacter                | k_Bacteria;p_Firmicutes;c_Clostridia;o_Lachnospirales;f_Lachnospiraceae;g<br>_Lachnospiraceae_UCG_001                      | 0.64452<br>5913      | 2.14<br>E-04 | 0.03345<br>0035 |
| k_Bacteria;p_Firmicutes;c_Clostridia;o_Oscillospirales;f_Ruminococcaceae;<br>g_Faecalibacterium                         | k_Bacteria;p_Firmicutes;c_Clostridia;o_Lachnospirales;f_Lachnospiraceae;g<br>_Lachnospiraceae_UCG_004                      | 0.60985<br>3589      | 5.70<br>E-04 | 0.06121<br>0159 |
| k_Bacteria;p_Proteobacteria;c_Gammaproteobacteria;o_Enterobacteriales;f_E<br>nterobacteriaceae;g_Escherichia_Shigella   | k_Bacteria;p_Firmicutes;c_Clostridia;o_Lachnospirales;f_Lachnospiraceae;g<br>_Roseburia                                    | -<br>0.61271<br>6131 | 5.28<br>E-04 | 0.05991<br>1637 |
| k_Bacteria;p_Firmicutes;c_Clostridia;o_Oscillospirales;f_Ruminococcaceae;<br>g_Eubacterium_siraeum                      | k_Bacteria;p_Firmicutes;c_Clostridia;o_Lachnospirales;f_Lachnospiraceae;g<br>_Ruminococcus_gauvreauii                      | 0.75951<br>2427      | 2.78<br>E-06 | 0.00224<br>2982 |
| k_Bacteria;p_Firmicutes;c_Clostridia;o_Peptostreptococcales_Tissierellales;f<br>_Anaerovoracaceae;g_Family_XIII_AD3011  | k_Bacteria;p_Firmicutes;c_Clostridia;o_Lachnospirales;f_Lachnospiraceae;g<br>_Ruminococcus_gauvreauii                      | 0.60736<br>3576      | 6.09<br>E-04 | 0.06167<br>4054 |
| k_Bacteria;p_Firmicutes;c_Clostridia;o_Oscillospirales;f_Oscillospiraceae;g<br>_NK4A214                                 | k_Bacteria;p_Firmicutes;c_Clostridia;o_Oscillospirales;f_Eubacterium_copr<br>ostanoligenes;g_Eubacterium_coprostanoligenes | 0.76480<br>5329      | 2.15<br>E-06 | 0.00191<br>357  |
| k_Bacteria;p_Firmicutes;c_Clostridia;o_Oscillospirales;f_Ruminococcaceae;<br>g_Ruminococcus                             | k_Bacteria;p_Firmicutes;c_Clostridia;o_Oscillospirales;f_Eubacterium_copr<br>ostanoligenes;g_Eubacterium_coprostanoligenes | 0.69263<br>5903      | 4.42<br>E-05 | 0.01357<br>0443 |
| k_Bacteria;p_Firmicutes;c_Clostridia;o_Peptostreptococcales_Tissierellales;f<br>_Anaerovoracaceae;g_Family_XIII_AD3011  | k_Bacteria;p_Firmicutes;c_Clostridia;o_Oscillospirales;f_Eubacterium_copr<br>ostanoligenes;g_Eubacterium_coprostanoligenes | 0.73632<br>1143      | 7.94<br>E-06 | 0.00372<br>6189 |
| k_Bacteria;p_Firmicutes;c_Clostridia;o_Oscillospirales;f_Ruminococcaceae;<br>g_Negativibacillus                         | k_Bacteria;p_Firmicutes;c_Clostridia;o_Oscillospirales;f_Oscillospiraceae;g<br>_NK4A214                                    | 0.73775<br>2684      | 7.47<br>E-06 | 0.00369<br>7584 |

|                                                                                                                     |                                                                                                                     |                 |              |                 |
|---------------------------------------------------------------------------------------------------------------------|---------------------------------------------------------------------------------------------------------------------|-----------------|--------------|-----------------|
| k_Bacteria;p_Firmicutes;c_Clostridia;o_Peptostreptococcales_Tissierellales;f_Anaerovoracaceae;g_Family_XIII_UCG_001 | k_Bacteria;p_Firmicutes;c_Clostridia;o_Oscillospirales;f_Oscillospiraceae;g_NK4A214                                 | 0.62423<br>7033 | 3.85<br>E-04 | 0.05121<br>16   |
| k_Bacteria;p_Firmicutes;c_Clostridia;o_Peptococcales;f_Peptococcaceae;g_Peptococcus                                 | k_Bacteria;p_Firmicutes;c_Clostridia;o_Oscillospirales;f_Ruminococcaceae;g_Eubacterium_siraeum                      | 0.65021<br>8649 | 1.80<br>E-04 | 0.02917<br>3582 |
| k_Bacteria;p_Firmicutes;c_Clostridia;o_Peptostreptococcales_Tissierellales;f_Anaerovoracaceae;g_Family_XIII_AD3011  | k_Bacteria;p_Firmicutes;c_Clostridia;o_Oscillospirales;f_Ruminococcaceae;g_Eubacterium_siraeum                      | 0.65167<br>4069 | 1.72<br>E-04 | 0.02841<br>5762 |
| k_Bacteria;p_Proteobacteria;c_Gammaproteobacteria;o_Burkholderiales;f_Oxalobacteraceae;g_Oxalobacter                | k_Bacteria;p_Firmicutes;c_Clostridia;o_Oscillospirales;f_Ruminococcaceae;g_Eubacterium_siraeum                      | 0.80695<br>1431 | 2.14<br>E-07 | 2.38E-<br>04    |
| k_Bacteria;p_Firmicutes;c_Clostridia;o_Peptostreptococcales_Tissierellales;f_Anaerovoracaceae;g_Family_XIII_UCG_001 | k_Bacteria;p_Firmicutes;c_Clostridia;o_Oscillospirales;f_Ruminococcaceae;g_Negativibacillus                         | 0.81152<br>1928 | 1.61<br>E-07 | 2.05E-<br>04    |
| k_Bacteria;p_Proteobacteria;c_Gammaproteobacteria;o_Burkholderiales;f_Oxalobacteraceae;g_Oxalobacter                | k_Bacteria;p_Firmicutes;c_Clostridia;o_Peptococcales;f_Peptococcaceae;g_Peptococcus                                 | 0.76548<br>8112 | 2.08<br>E-06 | 0.00191<br>357  |
| k_Bacteria;p_Proteobacteria;c_Gammaproteobacteria;o_Burkholderiales;f_Oxalobacteraceae;g_Oxalobacter                | k_Bacteria;p_Firmicutes;c_Clostridia;o_Peptostreptococcales_Tissierellales;f_Anaerovoracaceae;g_Family_XIII_AD3011  | 0.62360<br>7673 | 3.92<br>E-04 | 0.05135<br>3204 |
| k_Bacteria;p_Proteobacteria;c_Gammaproteobacteria;o_Burkholderiales;f_Oxalobacteraceae;g_Oxalobacter                | k_Bacteria;p_Firmicutes;c_Clostridia;o_Peptostreptococcales_Tissierellales;f_Anaerovoracaceae;g_Family_XIII_UCG_001 | 0.66635<br>0336 | 1.08<br>E-04 | 0.02053<br>1352 |

3

4 **Table S2** The results of Spearman abundance correlation analysis of TB2MT group at the genus level. Only significant correlations with  $p \leq 0.10$   
5 after false discovery rate correction and  $|r| \geq 0.6$  are displayed.

| genus_a                                                                                              | genus_b                                                                               | r               | p value  | p(FDR)   |
|------------------------------------------------------------------------------------------------------|---------------------------------------------------------------------------------------|-----------------|----------|----------|
| k_Bacteria;p_Proteobacteria;c_Gammaproteobacteria;o_Burkholderiales;f_Alcaligenaceae;g_Achromobacter | k_Fungi;p_Basidiomycota;c_Tremellomycetes;o_Tremellales;f_Tremellaceae;g_Cryptococcus | 0.71962291<br>7 | 1.08E-05 | 0.012073 |
| k_Bacteria;p_Bacteroidota;c_Bacteroidia;o_Bacteroidales;f_Prevotellace                               | k_Bacteria;p_Bacteroidota;c_Bacteroidia;o_Bacteroidales;f_Bacteroida                  | -               | 1.04E-05 | 0.012073 |



|                                                                                                                           |                                                                                              |            |          |          |
|---------------------------------------------------------------------------------------------------------------------------|----------------------------------------------------------------------------------------------|------------|----------|----------|
| ac;g_Prevotella                                                                                                           | ceae;g_Bacteroides                                                                           | 0.72052372 |          |          |
|                                                                                                                           |                                                                                              | 9          |          |          |
| k_Bacteria;p_Bacteroidota;c_Bacteroidia;o_Bacteroidales;f_Barnesiellac<br>eae;g_Copro bacter                              | k_Bacteria;p_Bacteroidota;c_Bacteroidia;o_Bacteroidales;f_Barnesiell<br>aceae;g_Barnesiella  | 0.71962291 | 1.08E-05 | 0.012073 |
|                                                                                                                           |                                                                                              | 7          |          |          |
| k_Bacteria;p_Firmicutes;c_Clostridia;o_Peptostreptococcales_Tissierella<br>les;f_Peptostreptococcaceae;g_Terrisporobacter | k_Bacteria;p_Bacteroidota;c_Bacteroidia;o_Bacteroidales;f_Barnesiell<br>aceae;g_Barnesiella  | 0.71962291 | 1.08E-05 | 0.012073 |
|                                                                                                                           |                                                                                              | 7          |          |          |
| k_Bacteria;p_Firmicutes;c_Clostridia;o_Peptostreptococcales_Tissierella<br>les;f_Peptostreptococcaceae;g_Terrisporobacter | k_Bacteria;p_Bacteroidota;c_Bacteroidia;o_Bacteroidales;f_Barnesiell<br>aceae;g_Copro bacter | 1          | 0        | 0        |
|                                                                                                                           |                                                                                              |            |          |          |
| k_Bacteria;p_Firmicutes;c_Clostridia;o_Peptostreptococcales_Tissierella<br>les;f_Anaerovoracaceae;g_Family_XIII_AD3011    | k_Bacteria;p_Bacteroidota;c_Bacteroidia;o_Bacteroidales;f_Marinifila<br>ceae;g_Butyricimonas | 0.68545808 | 4.07E-05 | 0.036303 |
|                                                                                                                           |                                                                                              | 2          |          |          |
| k_Bacteria;p_Firmicutes;c_Clostridia;o_Lachnospirales;f_Lachnospirace<br>ae;g_Lachnospiraceae_ND3007                      | k_Bacteria;p_Bacteroidota;c_Bacteroidia;o_Bacteroidales;f_Marinifila<br>ceae;g_Odoribacter   | 0.69127671 | 3.29E-05 | 0.032601 |
|                                                                                                                           |                                                                                              | 2          |          |          |
| k_Bacteria;p_Firmicutes;c_Clostridia;o_Lachnospirales;f_Lachnospirace<br>ae;g_Lachnospiraceae_ND3007                      | k_Bacteria;p_Bacteroidota;c_Bacteroidia;o_Bacteroidales;f_Rikenellac<br>eae;g_Alistipes      | 0.66735534 | 7.67E-05 | 0.049174 |
|                                                                                                                           |                                                                                              | 1          |          |          |
| k_Bacteria;p_Firmicutes;c_Clostridia;o_Oscillospirales;f_Ruminococcac<br>eae;g_Subdoligranulum                            | k_Bacteria;p_Firmicutes;c_Clostridia;o_Lachnospirales;f_Lachnospira<br>ceae;g_Agathobacter   | 0.66715001 | 7.73E-05 | 0.049174 |
|                                                                                                                           |                                                                                              | 2          |          |          |
| k_Bacteria;p_Firmicutes;c_Clostridia;o_Lachnospirales;f_Lachnospirace                                                     | k_Bacteria;p_Firmicutes;c_Clostridia;o_Lachnospirales;f_Lachnospira                          | 0.74232499 | 4.03E-06 | 0.011958 |
|                                                                                                                           |                                                                                              |            |          |          |

|                                                                                                                         |                                                                                                                        |                 |          |          |
|-------------------------------------------------------------------------------------------------------------------------|------------------------------------------------------------------------------------------------------------------------|-----------------|----------|----------|
| ac;g_Eubacterium_hallii                                                                                                 | ceae;g_Dorea                                                                                                           |                 |          |          |
| k_Bacteria;p_Firmicutes;c_Clostridia;o_Peptostreptococcales_Tissierella<br>les;f_Anaerovoracaceae;g_Family_XIII_UCG_001 | k_Bacteria;p_Firmicutes;c_Clostridia;o_Lachnospirales;f_Lachnospira<br>ceae;g_Lachnospiraceae_FCS020                   | 0.71962291<br>7 | 1.08E-05 | 0.012073 |
| k_Bacteria;p_Firmicutes;c_Clostridia;o_Monoglobales;f_Monoglobacea<br>e;g_Monoglobus                                    | k_Bacteria;p_Firmicutes;c_Clostridia;o_Lachnospirales;f_Lachnospira<br>ceae;g_Lachnospiraceae_UCG_001                  | 0.66101519<br>1 | 9.48E-05 | 0.056327 |
| k_Bacteria;p_Proteobacteria;c_Gammaproteobacteria;o_Burkholderiales;<br>f_Oxalobacteraceae;g_Oxalobacter                | k_Bacteria;p_Firmicutes;c_Clostridia;o_Oscillospirales;f_Oscillospirac<br>eae;g_NK4A214                                | 0.66822128      | 7.45E-05 | 0.049174 |
| k_Bacteria;p_Proteobacteria;c_Gammaproteobacteria;o_Pasteurellales;f_<br>Pasteurellaceae;g_Haemophilus                  | k_Bacteria;p_Firmicutes;c_Clostridia;o_Oscillospirales;f_Oscillospirac<br>eae;g_NK4A214                                | 0.80143043<br>9 | 1.75E-07 | 7.80E-04 |
| k_Bacteria;p_Proteobacteria;c_Gammaproteobacteria;o_Burkholderiales;<br>f_Oxalobacteraceae;g_Oxalobacter                | k_Bacteria;p_Firmicutes;c_Clostridia;o_Peptostreptococcales_Tissierel<br>ales;f_Anaerovoracaceae;g_Family_XIII_UCG_001 | 0.66822128      | 7.45E-05 | 0.049174 |

6

7 **Table S3** The results of Spearman abundance correlation analysis of TB6MT group at the genus level. Only significant correlations with  $p \leq 0.10$

8 after false discovery rate correction and  $|r| \geq 0.6$  are displayed.

| genus_a                                                                                         | genus_b                                                                                   | r           | p value  | p(FDR)          |
|-------------------------------------------------------------------------------------------------|-------------------------------------------------------------------------------------------|-------------|----------|-----------------|
| k_Fungi;p_Ascomycota;c_Eurotiomycetes;o_Chaetothyriales;f_Herpotri<br>chiellaceae;g_Phialophora | k_Fungi;p_Ascomycota;c_Dothideomycetes;o_Capnodiales;f_Cladosp<br>oriaceae;g_Cladosporium | 0.763456622 | 1.43E-04 | 0.06691<br>5869 |

|                                                                                                        |                                                                                                 |              |          |                 |
|--------------------------------------------------------------------------------------------------------|-------------------------------------------------------------------------------------------------|--------------|----------|-----------------|
| k_Fungi;p_Basidiomycota;c_Microbotryomycetes;o_Sporidiobolales;f_Sporidiobolaceae;g_Rhodotorula        | k_Fungi;p_Ascomycota;c_Dothideomycetes;o_Capnodiales;f_Cladosporiaceae;g_Cladosporium           | 0.764478479  | 1.38E-04 | 0.06691<br>5869 |
| k_Bacteria;p_Firmicutes;c_Clostridia;o_Lachnospirales;f_Lachnospiraceae;g_Eubacterium_oxidoreducens    | k_Fungi;p_Ascomycota;c_Dothideomycetes;o_Pleosporales;f_Sporormiaceae;g_Preussia                | 0.764060308  | 1.40E-04 | 0.06691<br>5869 |
| k_Fungi;p_Basidiomycota;c_Wallemyomycetes;o_Wallemyales;f_Wallemyaceae;g_Wallemya                      | k_Fungi;p_Ascomycota;c_Eurotiomycetes;o_Eurotiales;f_Aspergillaceae;g_Aspergillus               | 0.747108382  | 2.37E-04 | 0.08352<br>8931 |
| k_Fungi;p_Ascomycota;c_Sordariomycetes;o_Sordariales;f_Chaetomiaceae;g_Chaetomium                      | k_Fungi;p_Ascomycota;c_Saccharomycetes;o_Saccharomycetales;f_Dobryomycetaceae;g_Meyerozyma      | 0.80468873   | 3.26E-05 | 0.02107<br>149  |
| k_Bacteria;p_Firmicutes;c_Clostridia;o_Lachnospirales;f_Lachnospiraceae;g_Lachnospiraceae_ND3007       | k_Fungi;p_Ascomycota;c_Saccharomycetes;o_Saccharomycetales;f_Saccharomycetaceae;g_Saccharomyces | -0.728914386 | 4.00E-04 | 0.09198<br>3371 |
| k_Bacteria;p_Firmicutes;c_Bacilli;o_Lactobacillales;f_Streptococcaceae;g_Streptococcus                 | k_Fungi;p_Ascomycota;c_Sordariomycetes;o_Hypocreales;f_Nectriaceae;g_Gibberella                 | -0.76045555  | 1.57E-04 | 0.06767<br>8414 |
| k_Bacteria;p_Firmicutes;c_Clostridia;o_Clostridiales;f_Clostridiaceae;g_Clostridium_sensu_stricto_1    | k_Fungi;p_Basidiomycota;c_Agaricomycetes;o_Agaricales;f_Pleurotaceae;g_Pleurotus                | 0.756534362  | 1.78E-04 | 7.25E-<br>02    |
| k_Bacteria;p_Firmicutes;c_Negativicutes;o_Veillonellales_Selenomonadales;f_Veillonellaceae;g_Dialister | k_Fungi;p_Basidiomycota;c_Agaricomycetes;o_Agaricales;f_Pleurotaceae;g_Pleurotus                | 0.730548891  | 3.82E-04 | 0.09198<br>3371 |
| k_Bacteria;p_Firmicutes;c_Bacilli;o_Erysipelotrichales;f_Erysipelotrichaceae;g_Erysipelotrichum        | k_Fungi;p_Basidiomycota;c_Tremellomycetes;o_Filobasidiales;f_Filobasidium                       | 1            | 6.08E-   | 9.4224E         |

|                                                                                                                    |                                                                                                         |             |            |                 |
|--------------------------------------------------------------------------------------------------------------------|---------------------------------------------------------------------------------------------------------|-------------|------------|-----------------|
| aceae;g_Holdemanella                                                                                               | basidiaceae;g_Naganishia                                                                                |             | 132        | -129            |
| k_Bacteria;p_Firmicutes;c_Clostridia;o_Oscillospirales;f_Oscillospiraceae;g_NK4A214                                | k_Fungi;p_Mucoromycota;c_Mucoromycetes;o_Mucorales;f_Mucoraceae;g_Mucor                                 | 0.726483157 | 4.27E-04   | 0.09198<br>3371 |
| k_Bacteria;p_Bacteroidota;c_Bacteroidia;o_Bacteroidales;f_Barnesiellaceae;g_Copro bacter                           | k_Bacteria;p_Bacteroidota;c_Bacteroidia;o_Bacteroidales;f_Barnesiellaceae;g_Barnesiella                 | 0.726483157 | 4.27E-04   | 0.09198<br>3371 |
| k_Bacteria;p_Firmicutes;c_Clostridia;o_Lachnospirales;f_Lachnospiraceae;g_Eubacterium_eligens                      | k_Bacteria;p_Bacteroidota;c_Bacteroidia;o_Bacteroidales;f_Marinifilaceae;g_Odoribacter                  | 0.834073745 | 9.0765E-06 | 0.00639<br>4806 |
| k_Bacteria;p_Firmicutes;c_Clostridia;o_Lachnospirales;f_Lachnospiraceae;g_Ruminococcus_gauvreauii                  | k_Bacteria;p_Bacteroidota;c_Bacteroidia;o_Bacteroidales;f_Marinifilaceae;g_Odoribacter                  | 0.839254327 | 7.06E-06   | 5.80E-03        |
| k_Bacteria;p_Firmicutes;c_Clostridia;o_Peptostreptococcales_Tissierellales;f_Anaerovoracaceae;g_Family_XIII_AD3011 | k_Bacteria;p_Bacteroidota;c_Bacteroidia;o_Bacteroidales;f_Marinifilaceae;g_Odoribacter                  | 0.839254327 | 7.06E-06   | 5.80E-03        |
| k_Bacteria;p_Proteobacteria;c_Gammaproteobacteria;o_Xanthomonadales;f_Xanthomonadaceae;g_Stenotrophomonas          | k_Bacteria;p_Bacteroidota;c_Bacteroidia;o_Bacteroidales;f_Muribaculaceae;g_Muribaculaceae               | 0.76260079  | 1.47E-04   | 6.69E-02        |
| k_Bacteria;p_Firmicutes;c_Clostridia;o_Monoglobales;f_Monoglobaceae;g_Monoglobus                                   | k_Bacteria;p_Desulfobacterota;c_Desulfovibrionia;o_Desulfovibrionales;f_Desulfovibrionaceae;g_Bilophila | 0.763882021 | 1.41E-04   | 6.69E-02        |
| k_Bacteria;p_Firmicutes;c_Clostridia;o_Oscillospirales;f_Ruminococcaceae;g_Candidatus_Soleaferrea                  | k_Bacteria;p_Firmicutes;c_Bacilli;o_Lactobacillales;f_Enterococcaceae;g_Enterococcus                    | 0.726483157 | 4.27E-04   | 0.09198<br>3371 |

|                                                                                                                        |                                                                                                     |              |             |             |
|------------------------------------------------------------------------------------------------------------------------|-----------------------------------------------------------------------------------------------------|--------------|-------------|-------------|
| k_Bacteria;p_Firmicutes;c_Negativicutes;o_Acidaminococcales;f_Acidaminococcaceae;g_Phascalarectobacterium              | k_Bacteria;p_Firmicutes;c_Bacilli;o_Lactobacillales;f_Streptococcaceae;g_Streptococcus              | -0.740299011 | 2.90E-04    | 9.20E-02    |
| k_Bacteria;p_Firmicutes;c_Clostridia;o_Lachnospirales;f_Lachnospiraceae;g_Lachnospiraceae_FCS020                       | k_Bacteria;p_Firmicutes;c_Clostridia;o_Lachnospirales;f_Lachnospiraceae;g_Eubacterium_eligens       | 0.726483157  | 4.27E-04    | 0.091983371 |
| k_Bacteria;p_Firmicutes;c_Clostridia;o_Lachnospirales;f_Lachnospiraceae;g_Lachnospiraceae_NK4A136                      | k_Bacteria;p_Firmicutes;c_Clostridia;o_Lachnospirales;f_Lachnospiraceae;g_Eubacterium_eligens       | 0.726483157  | 0.000427278 | 0.091983371 |
| k_Bacteria;p_Firmicutes;c_Clostridia;o_Lachnospirales;f_Lachnospiraceae;g_Ruminococcus_gauvreauii                      | k_Bacteria;p_Firmicutes;c_Clostridia;o_Lachnospirales;f_Lachnospiraceae;g_Eubacterium_eligens       | 0.99382716   | 1.12E-17    | 1.23996E-14 |
| k_Bacteria;p_Firmicutes;c_Clostridia;o_Monoglobales;f_Monoglobaceae;g_Monoglobus                                       | k_Bacteria;p_Firmicutes;c_Clostridia;o_Lachnospirales;f_Lachnospiraceae;g_Eubacterium_eligens       | 0.742795681  | 0.00026938  | 0.090769438 |
| k_Bacteria;p_Firmicutes;c_Clostridia;o_Peptostreptococcales_Tissierellaes;f_Anaerovoracaceae;g_Family_XIII_AD3011      | k_Bacteria;p_Firmicutes;c_Clostridia;o_Lachnospirales;f_Lachnospiraceae;g_Eubacterium_eligens       | 0.99382716   | 1.11996E-17 | 1.23996E-14 |
| k_Bacteria;p_Firmicutes;c_Clostridia;o_Peptostreptococcales_Tissierellaes;f_Anaerovoracaceae;g_Family_XIII_UCG_001     | k_Bacteria;p_Firmicutes;c_Clostridia;o_Lachnospirales;f_Lachnospiraceae;g_Eubacterium_eligens       | 0.726483157  | 0.000427278 | 0.091983371 |
| k_Bacteria;p_Firmicutes;c_Clostridia;o_Oscillospirales;f_Eubacterium_coprostanoligenes;g_Eubacterium_coprostanoligenes | k_Bacteria;p_Firmicutes;c_Clostridia;o_Lachnospirales;f_Lachnospiraceae;g_Eubacterium_oxidoreducens | 0.73297674   | 0.000356982 | 0.091983371 |
| k_Bacteria;p_Firmicutes;c_Clostridia;o_Lachnospirales;f_Lachnospiraceae                                                | k_Bacteria;p_Firmicutes;c_Clostridia;o_Lachnospirales;f_Lachnospiraceae                             | 1            | 6.079E-04   | 9.4224E-02  |

|                                                                                                                         |                                                                                                       |             |                 |                 |
|-------------------------------------------------------------------------------------------------------------------------|-------------------------------------------------------------------------------------------------------|-------------|-----------------|-----------------|
| ae;g_Lachnospiraceae_NK4A136                                                                                            | ceae;g_Lachnospiraceae_FCS020                                                                         |             | 132             | -129            |
| k_Bacteria;p_Firmicutes;c_Clostridia;o_Peptostreptococcales_Tissierella<br>les;f_Anaerovoracaceae;g_Family_XIII_UCG_001 | k_Bacteria;p_Firmicutes;c_Clostridia;o_Lachnospirales;f_Lachnospira<br>ceae;g_Lachnospiraceae_FCS020  | 1           | 6.08E-<br>132   | 9.4224E<br>-129 |
| k_Bacteria;p_Firmicutes;c_Clostridia;o_Lachnospirales;f_Lachnospirace<br>ae;g_Roseburia                                 | k_Bacteria;p_Firmicutes;c_Clostridia;o_Lachnospirales;f_Lachnospira<br>ceae;g_Lachnospiraceae_ND3007  | 0.838076781 | 7.48207E<br>-06 | 0.00579<br>8605 |
| k_Bacteria;p_Firmicutes;c_Clostridia;o_Peptostreptococcales_Tissierella<br>les;f_Anaerovoracaceae;g_Family_XIII_UCG_001 | k_Bacteria;p_Firmicutes;c_Clostridia;o_Lachnospirales;f_Lachnospira<br>ceae;g_Lachnospiraceae_NK4A136 | 1           | 6.079E-<br>132  | 9.4224E<br>-129 |
| k_Bacteria;p_Firmicutes;c_Clostridia;o_Lachnospirales;f_Lachnospirace<br>ae;g_Ruminococcus_gauvreauii                   | k_Bacteria;p_Firmicutes;c_Clostridia;o_Lachnospirales;f_Lachnospira<br>ceae;g_Lachnospiraceae_UCG_001 | 0.726483157 | 0.000427<br>278 | 0.09198<br>3371 |
| k_Bacteria;p_Firmicutes;c_Clostridia;o_Peptostreptococcales_Tissierella<br>les;f_Anaerovoracaceae;g_Family_XIII_AD3011  | k_Bacteria;p_Firmicutes;c_Clostridia;o_Lachnospirales;f_Lachnospira<br>ceae;g_Lachnospiraceae_UCG_001 | 0.726483157 | 0.000427<br>278 | 0.09198<br>3371 |
| k_Bacteria;p_Firmicutes;c_Clostridia;o_Monoglobales;f_Monoglobacea<br>e;g_Monoglobus                                    | k_Bacteria;p_Firmicutes;c_Clostridia;o_Lachnospirales;f_Lachnospira<br>ceae;g_Ruminococcus_gauvreauii | 0.747409319 | 0.000234<br>991 | 0.08352<br>8931 |
| k_Bacteria;p_Firmicutes;c_Clostridia;o_Peptostreptococcales_Tissierella<br>les;f_Anaerovoracaceae;g_Family_XIII_AD3011  | k_Bacteria;p_Firmicutes;c_Clostridia;o_Lachnospirales;f_Lachnospira<br>ceae;g_Ruminococcus_gauvreauii | 1           | 0               | 0               |
| k_Bacteria;p_Firmicutes;c_Clostridia;o_Peptostreptococcales_Tissierella<br>les;f_Anaerovoracaceae;g_Family_XIII_AD3011  | k_Bacteria;p_Firmicutes;c_Clostridia;o_Monoglobales;f_Monoglobacea<br>ae;g_Monoglobus                 | 0.747409319 | 0.000234<br>991 | 0.08352<br>8931 |

|                                                                                                          |                                                                                            |              |          |                 |
|----------------------------------------------------------------------------------------------------------|--------------------------------------------------------------------------------------------|--------------|----------|-----------------|
| k_Bacteria;p_Firmicutes;c_Negativicutes;o_Veillonellales_Selenomonadales;f_Veillonellaceae;g_Veillonella | k_Bacteria;p_Firmicutes;c_Clostridia;o_Oscillospirales;f_Butyricicocaceae;g_Butyricicoccus | -0.739040883 | 3.00E-04 | 0.09198<br>3371 |
|----------------------------------------------------------------------------------------------------------|--------------------------------------------------------------------------------------------|--------------|----------|-----------------|

9

10 **Table S4** The results of Spearman abundance correlation analysis of HS group at the genus level. Only significant correlations with  $p \leq 0.10$  after  
11 false discovery rate correction and  $|r| \geq 0.6$  are displayed.

| genus_a                                                                                          | genus_b                                                                                     | r            | p value         | p(FDR)          |
|--------------------------------------------------------------------------------------------------|---------------------------------------------------------------------------------------------|--------------|-----------------|-----------------|
| k_Fungi;p_Ascomycota;c_Eurotiomycetes;o_Chaetothyriales;f_Trichomeriaceae;g_Knufia               | k_Fungi;p_Ascomycota;c_Dothideomycetes;o_Dothideales;f_Aureobasidiaceae;g_Aureobasidium     | 0.648783657  | 0.00108<br>9453 | 0.091586<br>029 |
| k_Fungi;p_Ascomycota;c_Saccharomycetes;o_Saccharomycetales;f_Phaeffomycetaceae;g_Wickerhamomyces | k_Fungi;p_Ascomycota;c_Dothideomycetes;o_Dothideales;f_Aureobasidiaceae;g_Aureobasidium     | 0.691396509  | 3.66E-04        | 0.053431<br>21  |
| k_Bacteria;p_Bacteroidota;c_Bacteroidia;o_Bacteroidales;f_Prevotellaceae;g_Paraprevotella        | k_Fungi;p_Ascomycota;c_Eurotiomycetes;o_Chaetothyriales;f_Herpotrichiellaceae;g_Exophiala   | -0.717948398 | 1.68E-04        | 0.036593<br>78  |
| k_Bacteria;p_Firmicutes;c_Clostridia;o_Oscillospirales;f_Oscillospiraceae;g_NK4A214              | k_Fungi;p_Ascomycota;c_Eurotiomycetes;o_Chaetothyriales;f_Herpotrichiellaceae;g_Exophiala   | -0.699003856 | 2.95E-04        | 0.047845<br>589 |
| k_Bacteria;p_Firmicutes;c_Bacilli;o_Erysipelotrichales;f_Erysipelotrichaceae;g_Holdemanella      | k_Fungi;p_Ascomycota;c_Eurotiomycetes;o_Chaetothyriales;f_Herpotrichiellaceae;g_Phialophora | -0.65589389  | 9.19E-04        | 0.081860<br>02  |
| k_Fungi;p_Ascomycota;c_Sordariomycetes;o_Hypocreales;f_Hypocreaceae                              | k_Fungi;p_Ascomycota;c_Eurotiomycetes;o_Eurotiales;f_Trichocomaceae                         | 0.659257012  | 8.46E-          | 0.081077        |

|                                                                                                         |                                                                                                            |              |                 |                 |
|---------------------------------------------------------------------------------------------------------|------------------------------------------------------------------------------------------------------------|--------------|-----------------|-----------------|
| eae;g_Trichoderma                                                                                       | ceae;g_Talaromyces                                                                                         |              | 04              | 183             |
| k_Bacteria;p_Fusobacteriota;c_Fusobacteriia;o_Fusobacteriales;f_Fusobacteriaceae;g_Fusobacterium        | k_Fungi;p_Ascomycota;c_Saccharomycetes;o_Saccharomycetales;f_Trichomonascaceae;g_Trichomonascus            | 0.767456359  | 3.07E-05        | 0.016991<br>198 |
| k_Bacteria;p_Proteobacteria;c_Gammaproteobacteria;o_Pseudomonadales;f_Moraxellaceae;g_Acinetobacter     | k_Fungi;p_Ascomycota;c_Saccharomycetes;o_Saccharomycetales;f_Trichomonascaceae;g_Trichomonascus            | 0.667705736  | 6.85E-04        | 0.071736<br>373 |
| k_Bacteria;p_Actinobacteriota;c_Coriobacteriia;o_Coriobacteriales;f_Eggerthellaceae;g_Senegalimassilia  | k_Fungi;p_Mucoromycota;c_Mucoromycetes;o_Mucorales;f_Mucoraceae;g_Mucor                                    | 0.642860512  | 0.00125<br>1718 | 0.097710<br>696 |
| k_Bacteria;p_Firmicutes;c_Negativicutes;o_Veillonellales_Selenomonadales;f_Selenomonadaceae;g_Megamonas | k_Bacteria;p_Actinobacteriota;c_Actinobacteriia;o_Bifidobacteriales;f_Bifidobacteriaceae;g_Bifidobacterium | -0.743660647 | 7.29E-05        | 0.024755<br>225 |
| k_Bacteria;p_Firmicutes;c_Clostridia;o_Lachnospirales;f_Lachnospiraceae;g_Ruminococcus_gnavus           | k_Bacteria;p_Actinobacteriota;c_Actinobacteriia;o_Micrococcales;f_Micrococccaceae;g_Rothia                 | 0.66672294   | 7.03E-04        | 0.071736<br>373 |
| k_Bacteria;p_Actinobacteriota;c_Coriobacteriia;o_Coriobacteriales;f_Eggerthellaceae;g_Eggerthella       | k_Bacteria;p_Actinobacteriota;c_Coriobacteriia;o_Coriobacteriales;f_Coriobacteriaceae;g_Collinsella        | -0.64234346  | 0.00126<br>681  | 0.097710<br>696 |
| k_Bacteria;p_Firmicutes;c_Clostridia;o_Lachnospirales;f_Lachnospiraceae;g_Eubacterium_oxidoreducens     | k_Bacteria;p_Actinobacteriota;c_Coriobacteriia;o_Coriobacteriales;f_Coriobacteriaceae;g_Collinsella        | 0.771359859  | 2.63E-05        | 0.016769<br>859 |
| k_Bacteria;p_Firmicutes;c_Clostridia;o_Oscillospirales;f_Oscillospiraceae;g_Flavonifractor              | k_Bacteria;p_Actinobacteriota;c_Coriobacteriia;o_Coriobacteriales;f_Eggerthellaceae;g_Eggerthella          | 0.782455037  | 1.68E-05        | 0.013720<br>782 |



|                                                                                                           |                                                                                                        |             |                 |                 |
|-----------------------------------------------------------------------------------------------------------|--------------------------------------------------------------------------------------------------------|-------------|-----------------|-----------------|
| k_Bacteria;p_Firmicutes;c_Clostridia;o_Clostridia_UCG_014;f_Clostridia_UCG_014;g_Clostridia_UCG_014       | k_Bacteria;p_Actinobacteriota;c_Coriobacteriia;o_Coriobacteriales;f_Eggerthellaceae;g_Senegalimassilia | 0.64216818  | 0.00127<br>1961 | 0.097710<br>696 |
| k_Bacteria;p_Proteobacteria;c_Gammaproteobacteria;o_Burkholderiales;f_Sutterellaceae;g_Parasutterella     | k_Bacteria;p_Bacteroidota;c_Bacteroidia;o_Bacteroidales;f_Bacteroidaceae;g_Bacteroides                 | 0.694173294 | 3.39E-<br>04    | 0.051798<br>987 |
| k_Bacteria;p_Bacteroidota;c_Bacteroidia;o_Bacteroidales;f_Rikenellaceae;g_Alistipes                       | k_Bacteria;p_Bacteroidota;c_Bacteroidia;o_Bacteroidales;f_Barnesiellaceae;g_Barnesiella                | 0.645193551 | 0.00118<br>551  | 0.096037<br>059 |
| k_Bacteria;p_Firmicutes;c_Clostridia;o_Lachnospirales;f_Lachnospiraceae;g_Coproccoccus                    | k_Bacteria;p_Bacteroidota;c_Bacteroidia;o_Bacteroidales;f_Barnesiellaceae;g_Barnesiella                | 0.704680164 | 2.51E-<br>04    | 0.043799<br>119 |
| k_Bacteria;p_Bacteroidota;c_Bacteroidia;o_Bacteroidales;f_Rikenellaceae;g_Alistipes                       | k_Bacteria;p_Bacteroidota;c_Bacteroidia;o_Bacteroidales;f_Marinifilaceae;g_Butyricimonas               | 0.728342411 | 1.21E-<br>04    | 0.029499<br>5   |
| k_Bacteria;p_Firmicutes;c_Clostridia;o_Christensenellales;f_Christensenellaceae;g_Christensenellaceae_R_7 | k_Bacteria;p_Bacteroidota;c_Bacteroidia;o_Bacteroidales;f_Marinifilaceae;g_Butyricimonas               | 0.766004534 | 3.24E-<br>05    | 0.016991<br>198 |
| k_Bacteria;p_Firmicutes;c_Clostridia;o_Lachnospirales;f_Lachnospiraceae;g_Coproccoccus                    | k_Bacteria;p_Bacteroidota;c_Bacteroidia;o_Bacteroidales;f_Marinifilaceae;g_Butyricimonas               | 0.745072019 | 6.94E-<br>05    | 0.024755<br>225 |
| k_Bacteria;p_Firmicutes;c_Clostridia;o_Lachnospirales;f_Lachnospiraceae;g_Lachnospiraceae_UCG_010         | k_Bacteria;p_Bacteroidota;c_Bacteroidia;o_Bacteroidales;f_Marinifilaceae;g_Butyricimonas               | 0.682091675 | 4.71E-<br>04    | 0.059983<br>267 |
| k_Bacteria;p_Firmicutes;c_Clostridia;o_Monoglobales;f_Monoglobaceae                                       | k_Bacteria;p_Bacteroidota;c_Bacteroidia;o_Bacteroidales;f_Marinifilaceae;g_Butyricimonas               | 0.717068133 | 1.73E-          | 0.036703        |

|                                                                                                                   |                                                                                              |             |             |                 |
|-------------------------------------------------------------------------------------------------------------------|----------------------------------------------------------------------------------------------|-------------|-------------|-----------------|
| e;g_Monoglobus                                                                                                    | ceae;g_Butyricimonas                                                                         |             | 04          | 047             |
| k_Bacteria;p_Firmicutes;c_Clostridia;o_Oscillospirales;f_Oscillospiraceae;g_NK4A214                               | k_Bacteria;p_Bacteroidota;c_Bacteroidia;o_Bacteroidales;f_Marinifila<br>ceae;g_Butyricimonas | 0.745151515 | 6.92E-05    | 0.024755<br>225 |
| k_Bacteria;p_Firmicutes;c_Clostridia;o_Peptostreptococcales_Tissierellaes;f_Anaerovoracaceae;g_Family_XIII_AD3011 | k_Bacteria;p_Bacteroidota;c_Bacteroidia;o_Bacteroidales;f_Marinifila<br>ceae;g_Butyricimonas | 0.886715433 | 3.91E-08    | 3.48E-04        |
| k_Bacteria;p_Firmicutes;c_Clostridia;o_Clostridia_UCG_014;f_Clostridia_UCG_014;g_Clostridia_UCG_014               | k_Bacteria;p_Bacteroidota;c_Bacteroidia;o_Bacteroidales;f_Marinifila<br>ceae;g_Odoribacter   | 0.651944221 | 0.001010455 | 0.087921<br>125 |
| k_Bacteria;p_Firmicutes;c_Clostridia;o_Lachnospirales;f_Lachnospiraceae;g_Coprococcus                             | k_Bacteria;p_Bacteroidota;c_Bacteroidia;o_Bacteroidales;f_Marinifila<br>ceae;g_Odoribacter   | 0.741586008 | 7.82E-05    | 0.024755<br>225 |
| k_Bacteria;p_Firmicutes;c_Clostridia;o_Oscillospirales;f_Oscillospiraceae;g_Colidextribacter                      | k_Bacteria;p_Bacteroidota;c_Bacteroidia;o_Bacteroidales;f_Marinifila<br>ceae;g_Odoribacter   | 0.668569011 | 6.70E-04    | 0.071439<br>879 |
| k_Bacteria;p_Proteobacteria;c_Gammaproteobacteria;o_Burkholderiales;f_Oxalobacteraceae;g_Oxalobacter              | k_Bacteria;p_Bacteroidota;c_Bacteroidia;o_Bacteroidales;f_Marinifila<br>ceae;g_Odoribacter   | 0.646082296 | 0.001161084 | 0.095800<br>19  |
| k_Bacteria;p_Proteobacteria;c_Gammaproteobacteria;o_Burkholderiales;f_Sutterellaceae;g_Sutterella                 | k_Bacteria;p_Bacteroidota;c_Bacteroidia;o_Bacteroidales;f_Marinifila<br>ceae;g_Odoribacter   | 0.706597807 | 2.37E-04    | 0.043095<br>292 |
| k_Bacteria;p_Firmicutes;c_Bacilli;o_Erysipelotrichales;f_Erysipelotrichaceae;g_Holdemanella                       | k_Bacteria;p_Bacteroidota;c_Bacteroidia;o_Bacteroidales;f_Prevotella<br>ceae;g_Prevotella    | 0.641186308 | 0.001301145 | 0.099098<br>302 |

|                                                                                                           |                                                                                        |              |             |             |
|-----------------------------------------------------------------------------------------------------------|----------------------------------------------------------------------------------------|--------------|-------------|-------------|
| k_Bacteria;p_Firmicutes;c_Clostridia;o_Oscillospirales;f_Oscillospiraceae;g_Colidextribacter              | k_Bacteria;p_Bacteroidota;c_Bacteroidia;o_Bacteroidales;f_Prevotellaaceae;g_Prevotella | 0.671812157  | 6.17E-04    | 0.071439879 |
| k_Bacteria;p_Proteobacteria;c_Gammaproteobacteria;o_Burkholderiales;f_Sutterellaceae;g_Sutterella         | k_Bacteria;p_Bacteroidota;c_Bacteroidia;o_Bacteroidales;f_Prevotellaaceae;g_Prevotella | 0.687429281  | 4.08E-04    | 0.056819329 |
| k_Bacteria;p_Firmicutes;c_Bacilli;o_Erysipelotrichales;f_Erysipelotrichaceae;g_Clostridium_innocuum       | k_Bacteria;p_Bacteroidota;c_Bacteroidia;o_Bacteroidales;f_Rikenellaceae;g_Alistipes    | -0.669883321 | 6.48E-04    | 0.071439879 |
| k_Bacteria;p_Firmicutes;c_Clostridia;o_Christensenellales;f_Christensenellaceae;g_Christensenellaceae_R_7 | k_Bacteria;p_Bacteroidota;c_Bacteroidia;o_Bacteroidales;f_Rikenellaceae;g_Alistipes    | 0.841914359  | 9.01E-07    | 0.001605142 |
| k_Bacteria;p_Firmicutes;c_Clostridia;o_Clostridia_UCG_014;f_Clostridia_UCG_014;g_Clostridia_UCG_014       | k_Bacteria;p_Bacteroidota;c_Bacteroidia;o_Bacteroidales;f_Rikenellaceae;g_Alistipes    | 0.646211197  | 0.001157577 | 0.09580019  |
| k_Bacteria;p_Firmicutes;c_Clostridia;o_Lachnospirales;f_Lachnospiraceae;g_Coproccoccus                    | k_Bacteria;p_Bacteroidota;c_Bacteroidia;o_Bacteroidales;f_Rikenellaceae;g_Alistipes    | 0.862640617  | 2.42E-07    | 7.18E-04    |
| k_Bacteria;p_Firmicutes;c_Clostridia;o_Lachnospirales;f_Lachnospiraceae;g_Eubacterium_ventriosum          | k_Bacteria;p_Bacteroidota;c_Bacteroidia;o_Bacteroidales;f_Rikenellaceae;g_Alistipes    | 0.70128004   | 2.77E-04    | 0.046960008 |
| k_Bacteria;p_Firmicutes;c_Clostridia;o_Lachnospirales;f_Lachnospiraceae;g_Lachnoclostridium               | k_Bacteria;p_Bacteroidota;c_Bacteroidia;o_Bacteroidales;f_Rikenellaceae;g_Alistipes    | -0.650008499 | 0.001058236 | 0.089808982 |
| k_Bacteria;p_Firmicutes;c_Clostridia;o_Lachnospirales;f_Lachnospiraceae;g_Lachnoclostridium               | k_Bacteria;p_Bacteroidota;c_Bacteroidia;o_Bacteroidales;f_Rikenellaceae;g_Alistipes    | -0.65344938  | 9.75E-04    | 0.085985    |

|                                                                                                                            |                                                                                         |              |                 |                 |
|----------------------------------------------------------------------------------------------------------------------------|-----------------------------------------------------------------------------------------|--------------|-----------------|-----------------|
| ac;g_Ruminococcus_gnavus                                                                                                   | eae;g_Alistipes                                                                         |              | 04              | 349             |
| k_Bacteria;p_Firmicutes;c_Clostridia;o_Monoglobales;f_Monoglobacea<br>e;g_Monoglobus                                       | k_Bacteria;p_Bacteroidota;c_Bacteroidia;o_Bacteroidales;f_Rikenellac<br>eae;g_Alistipes | 0.680366079  | 4.93E-<br>04    | 0.061922<br>061 |
| k_Bacteria;p_Firmicutes;c_Clostridia;o_Oscillospirales;f_Eubacterium_c<br>oprostanoligenes;g_Eubacterium_coprostanoligenes | k_Bacteria;p_Bacteroidota;c_Bacteroidia;o_Bacteroidales;f_Rikenellac<br>eae;g_Alistipes | 0.642576314  | 0.00125<br>9994 | 0.097710<br>696 |
| k_Bacteria;p_Firmicutes;c_Clostridia;o_Oscillospirales;f_Oscillospirace<br>ae;g_Flavonifractor                             | k_Bacteria;p_Bacteroidota;c_Bacteroidia;o_Bacteroidales;f_Rikenellac<br>eae;g_Alistipes | -0.751875284 | 5.46E-<br>05    | 0.024341<br>767 |
| k_Bacteria;p_Firmicutes;c_Clostridia;o_Oscillospirales;f_Oscillospirace<br>ae;g_NK4A214                                    | k_Bacteria;p_Bacteroidota;c_Bacteroidia;o_Bacteroidales;f_Rikenellac<br>eae;g_Alistipes | 0.743638778  | 7.29E-<br>05    | 0.024755<br>225 |
| k_Bacteria;p_Firmicutes;c_Clostridia;o_Peptococcales;f_Peptococcaceae<br>;g_Peptococcus                                    | k_Bacteria;p_Bacteroidota;c_Bacteroidia;o_Bacteroidales;f_Rikenellac<br>eae;g_Alistipes | 0.651705022  | 0.00101<br>6258 | 0.087921<br>125 |
| k_Bacteria;p_Firmicutes;c_Clostridia;o_Peptostreptococcales_Tissierella<br>les;f_Anaerovoracaceae;g_Family_XIII_AD3011     | k_Bacteria;p_Bacteroidota;c_Bacteroidia;o_Bacteroidales;f_Rikenellac<br>eae;g_Alistipes | 0.743554632  | 7.31E-<br>05    | 0.024755<br>225 |
| k_Bacteria;p_Firmicutes;c_Clostridia;o_Peptostreptococcales_Tissierella<br>les;f_Anaerovoracaceae;g_Family_XIII_UCG_001    | k_Bacteria;p_Bacteroidota;c_Bacteroidia;o_Bacteroidales;f_Rikenellac<br>eae;g_Alistipes | 0.687414886  | 4.08E-<br>04    | 0.056819<br>329 |
| k_Bacteria;p_Proteobacteria;c_Gammaproteobacteria;o_Burkholderiales;<br>f_Sutterellaceae;g_Sutterella                      | k_Bacteria;p_Bacteroidota;c_Bacteroidia;o_Bacteroidales;f_Rikenellac<br>eae;g_Alistipes | 0.728636476  | 1.20E-<br>04    | 0.029499<br>5   |

|                                                                                                           |                                                                                                                |              |             |             |
|-----------------------------------------------------------------------------------------------------------|----------------------------------------------------------------------------------------------------------------|--------------|-------------|-------------|
| k_Bacteria;p_Firmicutes;c_Clostridia;o_Oscillospirales;f_Oscillospiraceae;g_NK4A214                       | k_Bacteria;p_Firmicutes;c_Bacilli;o_Erysipelotrichales;f_Erysipelotricostriaceae;g_Erysipelatoclostridium      | -0.711035366 | 2.08E-04    | 0.040239608 |
| k_Bacteria;p_Firmicutes;c_Clostridia;o_Lachnospirales;f_Lachnospiraceae;g_Lachnospiraceae_UCG_010         | k_Bacteria;p_Firmicutes;c_Bacilli;o_Erysipelotrichales;f_Erysipelotricostriaceae;g_Erysipelotrichaceae_UCG_003 | 0.682390896  | 4.67E-04    | 0.059983267 |
| k_Bacteria;p_Firmicutes;c_Negativicutes;o_Veillonellales_Selenomonadales;f_Veillonellaceae;g_Dialister    | k_Bacteria;p_Firmicutes;c_Bacilli;o_Erysipelotrichales;f_Erysipelotricostriaceae;g_Erysipelotrichaceae_UCG_003 | 0.643380303  | 0.001236702 | 0.097710696 |
| k_Bacteria;p_Firmicutes;c_Clostridia;o_Christensenellales;f_Christensenellaceae;g_Christensenellaceae_R_7 | k_Bacteria;p_Firmicutes;c_Bacilli;o_Erysipelotrichales;f_Erysipelotrichaceae;g_Clostridium_innocuum            | -0.693106912 | 3.49E-04    | 0.051798987 |
| k_Bacteria;p_Firmicutes;c_Clostridia;o_Lachnospirales;f_Lachnospiraceae;g_Lachnospiraceae_ND3007          | k_Bacteria;p_Firmicutes;c_Bacilli;o_Erysipelotrichales;f_Erysipelotrichaceae;g_Clostridium_innocuum            | -0.656643594 | 9.02E-04    | 0.081651541 |
| k_Bacteria;p_Firmicutes;c_Clostridia;o_Lachnospirales;f_Lachnospiraceae;g_Ruminococcus_gnavus             | k_Bacteria;p_Firmicutes;c_Bacilli;o_Erysipelotrichales;f_Erysipelotrichaceae;g_Clostridium_innocuum            | 0.669599817  | 6.53E-04    | 0.071439879 |
| k_Bacteria;p_Firmicutes;c_Clostridia;o_Oscillospirales;f_Ruminococcaeae;g_Ruminococcus                    | k_Bacteria;p_Firmicutes;c_Bacilli;o_Erysipelotrichales;f_Erysipelotrichaceae;g_Clostridium_innocuum            | -0.670357881 | 6.41E-04    | 0.071439879 |
| k_Bacteria;p_Firmicutes;c_Clostridia;o_Oscillospirales;f_Ruminococcaeae;g_Subdoligranulum                 | k_Bacteria;p_Firmicutes;c_Bacilli;o_Erysipelotrichales;f_Erysipelotrichaceae;g_Clostridium_innocuum            | -0.728055055 | 1.22E-04    | 0.0294995   |
| k_Bacteria;p_Firmicutes;c_Clostridia;o_Clostridia_UCG_014;f_Clostrid                                      | k_Bacteria;p_Firmicutes;c_Bacilli;o_Erysipelotrichales;f_Erysipelotric                                         | 0.67464905   | 5.73E-      | 0.069045    |

|                                                                                                     |                                                                                                               |              |              |                 |
|-----------------------------------------------------------------------------------------------------|---------------------------------------------------------------------------------------------------------------|--------------|--------------|-----------------|
| ia_UCG_014;g_Clostridia_UCG_014                                                                     | haceae;g_Holdemanella                                                                                         |              | 04           | 501             |
| k_Bacteria;p_Firmicutes;c_Clostridia;o_Peptococcales;f_Peptococcaceae;<br>;g_Peptococcus            | k_Bacteria;p_Firmicutes;c_Bacilli;o_Erysipelotrichales;f_Erysipelotric<br>haceae;g_Holdemanella               | 0.796862097  | 9.06E-<br>06 | 0.010087<br>094 |
| k_Bacteria;p_Proteobacteria;c_Gammaproteobacteria;o_Pasteurellales;f_Pasteurellaceae;g_Haemophilus  | k_Bacteria;p_Firmicutes;c_Bacilli;o_Erysipelotrichales;f_Erysipelotric<br>haceae;g_Turicibacter               | 0.693552273  | 3.44E-<br>04 | 0.051798<br>987 |
| k_Bacteria;p_Firmicutes;c_Clostridia;o_Lachnospirales;f_Lachnospiraceae;<br>g_Ruminococcus_gnavus   | k_Bacteria;p_Firmicutes;c_Bacilli;o_Lactobacillales;f_Streptococcaceae;<br>g_Streptococcus                    | 0.66839233   | 6.73E-<br>04 | 0.071439<br>879 |
| k_Bacteria;p_Firmicutes;c_Clostridia;o_Clostridia_UCG_014;f_Clostridia_UCG_014;g_Clostridia_UCG_014 | k_Bacteria;p_Firmicutes;c_Clostridia;o_Christensenellales;f_Christensenellaceae;<br>g_Christensenellaceae_R_7 | 0.684940867  | 4.36E-<br>04 | 0.058927<br>072 |
| k_Bacteria;p_Firmicutes;c_Clostridia;o_Lachnospirales;f_Lachnospiraceae;<br>g_Coprococcus           | k_Bacteria;p_Firmicutes;c_Clostridia;o_Christensenellales;f_Christensenellaceae;<br>g_Christensenellaceae_R_7 | 0.753217698  | 5.21E-<br>05 | 0.024341<br>767 |
| k_Bacteria;p_Firmicutes;c_Clostridia;o_Lachnospirales;f_Lachnospiraceae;<br>g_Lachnoclostridium     | k_Bacteria;p_Firmicutes;c_Clostridia;o_Christensenellales;f_Christensenellaceae;<br>g_Christensenellaceae_R_7 | -0.665696667 | 7.21E-<br>04 | 0.072182<br>838 |
| k_Bacteria;p_Firmicutes;c_Clostridia;o_Monoglobales;f_Monoglobaceae;<br>g_Monoglobus                | k_Bacteria;p_Firmicutes;c_Clostridia;o_Christensenellales;f_Christensenellaceae;<br>g_Christensenellaceae_R_7 | 0.687815032  | 4.04E-<br>04 | 0.056819<br>329 |
| k_Bacteria;p_Firmicutes;c_Clostridia;o_Oscillospirales;f_Oscillospiraceae;<br>g_NK4A214             | k_Bacteria;p_Firmicutes;c_Clostridia;o_Christensenellales;f_Christensenellaceae;<br>g_Christensenellaceae_R_7 | 0.672801322  | 6.02E-<br>04 | 0.071439<br>879 |

|                                                                                                                         |                                                                                                               |             |              |                 |
|-------------------------------------------------------------------------------------------------------------------------|---------------------------------------------------------------------------------------------------------------|-------------|--------------|-----------------|
| k_Bacteria;p_Firmicutes;c_Clostridia;o_Peptococcales;f_Peptococcaceae;<br>;g_Peptococcus                                | k_Bacteria;p_Firmicutes;c_Clostridia;o_Christensenellales;f_Christens<br>enellaceae;g_Christensenellaceae_R_7 | 0.736713721 | 9.22E-<br>05 | 0.026512<br>123 |
| k_Bacteria;p_Firmicutes;c_Clostridia;o_Peptostreptococcales_Tissierella<br>les;f_Anaerovoracaceae;g_Family_XIII_AD3011  | k_Bacteria;p_Firmicutes;c_Clostridia;o_Christensenellales;f_Christens<br>enellaceae;g_Christensenellaceae_R_7 | 0.760370618 | 4.01E-<br>05 | 0.019843<br>43  |
| k_Bacteria;p_Firmicutes;c_Clostridia;o_Peptostreptococcales_Tissierella<br>les;f_Anaerovoracaceae;g_Family_XIII_UCG_001 | k_Bacteria;p_Firmicutes;c_Clostridia;o_Christensenellales;f_Christens<br>enellaceae;g_Christensenellaceae_R_7 | 0.658354806 | 8.65E-<br>04 | 0.081632<br>595 |
| k_Bacteria;p_Proteobacteria;c_Gammaproteobacteria;o_Burkholderiales;<br>f_Sutterellaceae;g_Sutterella                   | k_Bacteria;p_Firmicutes;c_Clostridia;o_Christensenellales;f_Christens<br>enellaceae;g_Christensenellaceae_R_7 | 0.711934448 | 2.02E-<br>04 | 0.040038<br>795 |
| k_Bacteria;p_Firmicutes;c_Clostridia;o_Clostridia_vadinBB60;f_Clostri<br>dia_vadinBB60;g_Clostridia_vadinBB60           | k_Bacteria;p_Firmicutes;c_Clostridia;o_Clostridia_UCG_014;f_Clostri<br>dia_UCG_014;g_Clostridia_UCG_014       | 0.868858754 | 1.56E-<br>07 | 6.96E-04        |
| k_Bacteria;p_Firmicutes;c_Clostridia;o_Lachnospirales;f_Lachnospirace<br>ae;g_Coprococcus                               | k_Bacteria;p_Firmicutes;c_Clostridia;o_Clostridia_UCG_014;f_Clostri<br>dia_UCG_014;g_Clostridia_UCG_014       | 0.664170153 | 7.49E-<br>04 | 0.073078<br>264 |
| k_Bacteria;p_Firmicutes;c_Clostridia;o_Oscillospirales;f_Ruminococcac<br>eae;g_Eubacterium_siraeum                      | k_Bacteria;p_Firmicutes;c_Clostridia;o_Clostridia_UCG_014;f_Clostri<br>dia_UCG_014;g_Clostridia_UCG_014       | 0.821635012 | 2.75E-<br>06 | 0.003505<br>798 |
| k_Bacteria;p_Firmicutes;c_Clostridia;o_Peptococcales;f_Peptococcaceae<br>;g_Peptococcus                                 | k_Bacteria;p_Firmicutes;c_Clostridia;o_Clostridia_UCG_014;f_Clostri<br>dia_UCG_014;g_Clostridia_UCG_014       | 0.735755574 | 9.52E-<br>05 | 0.026516<br>695 |
| k_Bacteria;p_Firmicutes;c_Clostridia;o_Peptostreptococcales_Tissierella                                                 | k_Bacteria;p_Firmicutes;c_Clostridia;o_Clostridia_UCG_014;f_Clostri                                           | 0.836498761 | 1.23E-       | 0.001829        |

|                                                                                                                         |                                                                                                           |              |          |                 |
|-------------------------------------------------------------------------------------------------------------------------|-----------------------------------------------------------------------------------------------------------|--------------|----------|-----------------|
| les;f_Anaerovoracaceae;g_Family_XIII_UCG_001                                                                            | dia_UCG_014;g_Clostridia_UCG_014                                                                          |              | 06       | 36              |
| k_Bacteria;p_Proteobacteria;c_Gammaproteobacteria;o_Burkholderiales;<br>f_Oxalobacteraceae;g_Oxalobacter                | k_Bacteria;p_Firmicutes;c_Clostridia;o_Clostridia_UCG_014;f_Clostridia_UCG_014;g_Clostridia_UCG_014       | 0.85171424   | 4.96E-07 | 0.001104<br>342 |
| k_Bacteria;p_Firmicutes;c_Clostridia;o_Lachnospirales;f_Lachnospiraceae;g_Coproccoccus                                  | k_Bacteria;p_Firmicutes;c_Clostridia;o_Clostridia_vadinBB60;f_Clostridia_vadinBB60;g_Clostridia_vadinBB60 | 0.705558112  | 2.44E-04 | 0.043542<br>509 |
| k_Bacteria;p_Firmicutes;c_Clostridia;o_Oscillospirales;f_Oscillospiraceae;g_Flavonifractor                              | k_Bacteria;p_Firmicutes;c_Clostridia;o_Clostridia_vadinBB60;f_Clostridia_vadinBB60;g_Clostridia_vadinBB60 | -0.739975028 | 8.27E-05 | 0.024755<br>225 |
| k_Bacteria;p_Firmicutes;c_Clostridia;o_Oscillospirales;f_Ruminococcaceae;g_Eubacterium_siraeum                          | k_Bacteria;p_Firmicutes;c_Clostridia;o_Clostridia_vadinBB60;f_Clostridia_vadinBB60;g_Clostridia_vadinBB60 | 0.676103534  | 5.52E-04 | 0.067386<br>434 |
| k_Bacteria;p_Firmicutes;c_Clostridia;o_Peptococcales;f_Peptococcaceae;g_Peptococcus                                     | k_Bacteria;p_Firmicutes;c_Clostridia;o_Clostridia_vadinBB60;f_Clostridia_vadinBB60;g_Clostridia_vadinBB60 | 0.6666118    | 7.04E-04 | 0.071736<br>373 |
| k_Bacteria;p_Firmicutes;c_Clostridia;o_Peptostreptococcales_Tissierella<br>les;f_Anaerovoracaceae;g_Family_XIII_UCG_001 | k_Bacteria;p_Firmicutes;c_Clostridia;o_Clostridia_vadinBB60;f_Clostridia_vadinBB60;g_Clostridia_vadinBB60 | 0.722832072  | 1.45E-04 | 0.033357        |
| k_Bacteria;p_Proteobacteria;c_Gammaproteobacteria;o_Burkholderiales;<br>f_Oxalobacteraceae;g_Oxalobacter                | k_Bacteria;p_Firmicutes;c_Clostridia;o_Clostridia_vadinBB60;f_Clostridia_vadinBB60;g_Clostridia_vadinBB60 | 0.697200257  | 3.11E-04 | 0.049464<br>931 |
| k_Bacteria;p_Firmicutes;c_Clostridia;o_Lachnospirales;f_Lachnospiraceae;g_Lachnospira                                   | k_Bacteria;p_Firmicutes;c_Clostridia;o_Lachnospirales;f_Lachnospiraceae;g_Agathobacter                    | 0.668876081  | 6.65E-04 | 0.071439<br>879 |



|                                                                                                                        |                                                                                                      |              |              |                 |
|------------------------------------------------------------------------------------------------------------------------|------------------------------------------------------------------------------------------------------|--------------|--------------|-----------------|
| k_Bacteria;p_Proteobacteria;c_Gammaproteobacteria;o_Enterobacterales;<br>f_Enterobacteriaceae;g_Escherichia_Shigella   | k_Bacteria;p_Firmicutes;c_Clostridia;o_Lachnospirales;f_Lachnospira<br>ceae;g_Anaerostipes           | -0.663883239 | 7.54E-<br>04 | 0.073078<br>264 |
| k_Bacteria;p_Proteobacteria;c_Gammaproteobacteria;o_Pseudomonadales;<br>f_Moraxellaceae;g_Acinetobacter                | k_Bacteria;p_Firmicutes;c_Clostridia;o_Lachnospirales;f_Lachnospira<br>ceae;g_Blautia                | -0.656999891 | 8.94E-<br>04 | 0.081651<br>541 |
| k_Bacteria;p_Firmicutes;c_Clostridia;o_Oscillospirales;f_Oscillospiraceae;<br>g_Flavonifractor                         | k_Bacteria;p_Firmicutes;c_Clostridia;o_Lachnospirales;f_Lachnospira<br>ceae;g_Coprococcus            | -0.731777713 | 1.09E-<br>04 | 0.029315<br>343 |
| k_Bacteria;p_Firmicutes;c_Clostridia;o_Peptostreptococcales_Tissierella<br>les;f_Anaerovoracaceae;g_Family_XIII_AD3011 | k_Bacteria;p_Firmicutes;c_Clostridia;o_Lachnospirales;f_Lachnospira<br>ceae;g_Coprococcus            | 0.699114424  | 2.94E-<br>04 | 0.047845<br>589 |
| k_Bacteria;p_Proteobacteria;c_Gammaproteobacteria;o_Burkholderiales;<br>f_Sutterellaceae;g_Sutterella                  | k_Bacteria;p_Firmicutes;c_Clostridia;o_Lachnospirales;f_Lachnospira<br>ceae;g_Coprococcus            | 0.719677356  | 1.60E-<br>04 | 0.035555<br>507 |
| k_Bacteria;p_Firmicutes;c_Clostridia;o_Oscillospirales;f_Ruminococcaceae;<br>g_Candidatus_Soleaferrea                  | k_Bacteria;p_Firmicutes;c_Clostridia;o_Lachnospirales;f_Lachnospira<br>ceae;g_Dorea                  | 0.669261652  | 6.59E-<br>04 | 0.071439<br>879 |
| k_Bacteria;p_Firmicutes;c_Clostridia;o_Lachnospirales;f_Lachnospiraceae;<br>g_Lachnospiraceae_FCS020                   | k_Bacteria;p_Firmicutes;c_Clostridia;o_Lachnospirales;f_Lachnospira<br>ceae;g_Eubacterium_ventriosum | 0.656466741  | 9.06E-<br>04 | 0.081651<br>541 |
| k_Bacteria;p_Firmicutes;c_Clostridia;o_Monoglobales;f_Monoglobaceae;<br>g_Monoglobus                                   | k_Bacteria;p_Firmicutes;c_Clostridia;o_Lachnospirales;f_Lachnospira<br>ceae;g_Eubacterium_ventriosum | 0.66878803   | 6.67E-<br>04 | 0.071439<br>879 |
| k_Bacteria;p_Firmicutes;c_Clostridia;o_Lachnospirales;f_Lachnospiraceae                                                | k_Bacteria;p_Firmicutes;c_Clostridia;o_Lachnospirales;f_Lachnospira                                  | 0.700948429  | 2.79E-       | 0.046960        |

|                                                                                                                        |                                                                                                   |              |                 |                 |
|------------------------------------------------------------------------------------------------------------------------|---------------------------------------------------------------------------------------------------|--------------|-----------------|-----------------|
| ae;g_Lachnospiraceae_ND3007                                                                                            | ceae;g_Fusicatenibacter                                                                           |              | 04              | 008             |
| k_Bacteria;p_Firmicutes;c_Clostridia;o_Monoglobales;f_Monoglobaceae;g_Monoglobus                                       | k_Bacteria;p_Firmicutes;c_Clostridia;o_Lachnospirales;f_Lachnospiraceae;g_Fusicatenibacter        | 0.645419536  | 0.00117<br>9258 | 0.096037<br>059 |
| k_Bacteria;p_Firmicutes;c_Clostridia;o_Oscillospirales;f_Ruminococcaeae;g_Ruminococcus                                 | k_Bacteria;p_Firmicutes;c_Clostridia;o_Lachnospirales;f_Lachnospiraceae;g_Fusicatenibacter        | 0.739729546  | 8.33E-<br>05    | 0.024755<br>225 |
| k_Bacteria;p_Firmicutes;c_Clostridia;o_Lachnospirales;f_Lachnospiraceae;g_Lachnospiraceae_FCS020                       | k_Bacteria;p_Firmicutes;c_Clostridia;o_Lachnospirales;f_Lachnospiraceae;g_Lachnoclostridium       | -0.664503022 | 7.43E-<br>04    | 0.073078<br>264 |
| k_Bacteria;p_Firmicutes;c_Clostridia;o_Monoglobales;f_Monoglobaceae;g_Monoglobus                                       | k_Bacteria;p_Firmicutes;c_Clostridia;o_Lachnospirales;f_Lachnospiraceae;g_Lachnospiraceae_ND3007  | 0.777646047  | 2.05E-<br>05    | 0.015132<br>952 |
| k_Bacteria;p_Firmicutes;c_Clostridia;o_Oscillospirales;f_Ruminococcaeae;g_Ruminococcus                                 | k_Bacteria;p_Firmicutes;c_Clostridia;o_Lachnospirales;f_Lachnospiraceae;g_Lachnospiraceae_ND3007  | 0.744951166  | 6.97E-<br>05    | 0.024755<br>225 |
| k_Bacteria;p_Firmicutes;c_Clostridia;o_Oscillospirales;f_Eubacterium_coprostanoligenes;g_Eubacterium_coprostanoligenes | k_Bacteria;p_Firmicutes;c_Clostridia;o_Lachnospirales;f_Lachnospiraceae;g_Lachnospiraceae_UCG_004 | 0.658111421  | 8.70E-<br>04    | 0.081632<br>595 |
| k_Bacteria;p_Firmicutes;c_Clostridia;o_Oscillospirales;f_Oscillospiraceae;g_Colidextribacter                           | k_Bacteria;p_Firmicutes;c_Clostridia;o_Lachnospirales;f_Lachnospiraceae;g_Lachnospiraceae_UCG_010 | 0.775819311  | 2.21E-<br>05    | 0.015132<br>952 |
| k_Bacteria;p_Firmicutes;c_Clostridia;o_Oscillospirales;f_Ruminococcaeae;g_Subdoligranulum                              | k_Bacteria;p_Firmicutes;c_Clostridia;o_Lachnospirales;f_Lachnospiraceae;g_Lachnospiraceae_UCG_010 | 0.64341966   | 0.00123<br>5571 | 0.097710<br>696 |

|                                                                                                                 |                                                                                                                        |              |             |             |
|-----------------------------------------------------------------------------------------------------------------|------------------------------------------------------------------------------------------------------------------------|--------------|-------------|-------------|
| k_Bacteria;p_Firmicutes;c_Clostridia;o_Lachnospirales;f_Lachnospiraceae;g_Ruminococcus_torques                  | k_Bacteria;p_Firmicutes;c_Clostridia;o_Lachnospirales;f_Lachnospiraceae;g_Roseburia                                    | 0.766345357  | 3.20E-05    | 0.016991198 |
| k_Bacteria;p_Firmicutes;c_Clostridia;o_Oscillospirales;f_Ruminococcaceae;g_Subdoligranulum                      | k_Bacteria;p_Firmicutes;c_Clostridia;o_Lachnospirales;f_Lachnospiraceae;g_Ruminococcus_gnavus                          | -0.650820288 | 0.001037969 | 0.088935977 |
| k_Bacteria;p_Firmicutes;c_Negativicutes;o_Veillonellales_Selenomonadales;f_Veillonellaceae;g_Dialister          | k_Bacteria;p_Firmicutes;c_Clostridia;o_Lachnospirales;f_Lachnospiraceae;g_Ruminococcus_gnavus                          | -0.683645952 | 4.52E-04    | 0.059983267 |
| k_Bacteria;p_Firmicutes;c_Clostridia;o_Oscillospirales;f_Oscillospiraceae;g_NK4A214                             | k_Bacteria;p_Firmicutes;c_Clostridia;o_Monoglobales;f_Monoglobaceae;g_Monoglobus                                       | 0.696083697  | 3.21E-04    | 0.050156263 |
| k_Bacteria;p_Firmicutes;c_Clostridia;o_Oscillospirales;f_Ruminococcaceae;g_Ruminococcus                         | k_Bacteria;p_Firmicutes;c_Clostridia;o_Monoglobales;f_Monoglobaceae;g_Monoglobus                                       | 0.714993749  | 1.84E-04    | 0.038196885 |
| k_Bacteria;p_Firmicutes;c_Clostridia;o_Peptostreptococcales_Tissierellales;f_Peptostreptococcaceae;g_Romboutsia | k_Bacteria;p_Firmicutes;c_Clostridia;o_Monoglobales;f_Monoglobaceae;g_Monoglobus                                       | 0.71227169   | 2.00E-04    | 0.040038795 |
| k_Bacteria;p_Firmicutes;c_Clostridia;o_Oscillospirales;f_Oscillospiraceae;g_NK4A214                             | k_Bacteria;p_Firmicutes;c_Clostridia;o_Oscillospirales;f_Eubacterium_coprostanoligenes;g_Eubacterium_coprostanoligenes | 0.728790999  | 1.20E-04    | 0.0294995   |
| k_Bacteria;p_Proteobacteria;c_Gammaproteobacteria;o_Burkholderiales;f_Sutterellaceae;g_Sutterella               | k_Bacteria;p_Firmicutes;c_Clostridia;o_Oscillospirales;f_Eubacterium_coprostanoligenes;g_Eubacterium_coprostanoligenes | 0.739875047  | 8.29E-05    | 0.024755225 |
| k_Bacteria;p_Firmicutes;c_Negativicutes;o_Veillonellales_Selenomonadales;f_Veillonellaceae;g_Dialister          | k_Bacteria;p_Firmicutes;c_Clostridia;o_Oscillospirales;f_Oscillospiraceae;g_Roseburia                                  | 0.783583413  | 1.61E-05    | 0.013720198 |

|                                                                         |                                                                        |              |        |          |
|-------------------------------------------------------------------------|------------------------------------------------------------------------|--------------|--------|----------|
| ales;f_Veillonellaceae;g_Dialister                                      | eae;g_Colidextribacter                                                 |              | 05     | 782      |
| k_Bacteria;p_Firmicutes;c_Clostridia;o_Peptostreptococcales_Tissierella | k_Bacteria;p_Firmicutes;c_Clostridia;o_Oscillospirales;f_Oscillospirac | -0.708141479 | 2.26E- | 0.042928 |
| les;f_Anaerovoracaceae;g_Family_XIII_UCG_001                            | eae;g_Flavonifractor                                                   |              | 04     | 084      |
| k_Bacteria;p_Proteobacteria;c_Gammaproteobacteria;o_Burkholderiales;    | k_Bacteria;p_Firmicutes;c_Clostridia;o_Oscillospirales;f_Oscillospirac | -0.722532116 | 1.46E- | 0.033357 |
| f_Sutterellaceae;g_Sutterella                                           | eae;g_Flavonifractor                                                   |              | 04     |          |
| k_Bacteria;p_Firmicutes;c_Clostridia;o_Peptostreptococcales_Tissierella | k_Bacteria;p_Firmicutes;c_Clostridia;o_Oscillospirales;f_Oscillospirac | 0.656412181  | 9.07E- | 0.081651 |
| les;f_Anaerovoracaceae;g_Family_XIII_AD3011                             | eae;g_NK4A214                                                          |              | 04     | 541      |
| k_Bacteria;p_Proteobacteria;c_Gammaproteobacteria;o_Burkholderiales;    | k_Bacteria;p_Firmicutes;c_Clostridia;o_Oscillospirales;f_Oscillospirac | 0.686183875  | 4.22E- | 0.057851 |
| f_Sutterellaceae;g_Sutterella                                           | eae;g_NK4A214                                                          |              | 04     | 922      |
| k_Bacteria;p_Firmicutes;c_Clostridia;o_Peptococcales;f_Peptococcaceae   | k_Bacteria;p_Firmicutes;c_Clostridia;o_Oscillospirales;f_Ruminococc    | 0.666391412  | 7.08E- | 0.071736 |
| ;g_Peptococcus                                                          | aceae;g_Eubacterium_siraeum                                            |              | 04     | 373      |
| k_Bacteria;p_Proteobacteria;c_Gammaproteobacteria;o_Burkholderiales;    | k_Bacteria;p_Firmicutes;c_Clostridia;o_Oscillospirales;f_Ruminococc    | 0.782321422  | 1.69E- | 0.013720 |
| f_Oxalobacteraceae;g_Oxalobacter                                        | aceae;g_Eubacterium_siraeum                                            |              | 05     | 782      |
| k_Bacteria;p_Firmicutes;c_Clostridia;o_Peptococcales;f_Peptococcaceae   | k_Bacteria;p_Firmicutes;c_Clostridia;o_Oscillospirales;f_Ruminococc    | 0.707377827  | 2.32E- | 0.042993 |
| ;g_Peptococcus                                                          | aceae;g_Negativibacillus                                               |              | 04     | 409      |
| k_Bacteria;p_Firmicutes;c_Negativicutes;o_Veillonellales_Selenomonad    | k_Bacteria;p_Firmicutes;c_Clostridia;o_Oscillospirales;f_Ruminococc    | 0.683085253  | 4.59E- | 0.059983 |
| ales;f_Veillonellaceae;g_Dialister                                      | aceae;g_Subdoligranulum                                                |              | 04     | 267      |

|                                                                         |                                                                     |             |        |          |
|-------------------------------------------------------------------------|---------------------------------------------------------------------|-------------|--------|----------|
| k_Bacteria;p_Firmicutes;c_Clostridia;o_Peptostreptococcales_Tissierella | k_Bacteria;p_Firmicutes;c_Clostridia;o_Peptococcales;f_Peptococcace | 0.676300578 | 5.49E- | 0.067386 |
| les;f_Anaerovoracaceae;g_Family_XIII_UCG_001                            | ae;g_Peptococcus                                                    |             | 04     | 434      |

12
